# Supplementary material for: A core network in the SARS-CoV-2 nucleocapsid NTD mediates structural integrity and selective RNA-binding
Source: Springer Nature journal article supplement (doi:10.1038/s41467-024-55024-0), 2024-12-09
Supplement: MOESM1 [file 41467_2024_55024_MOESM1_ESM.pdf]

## Supplementary Information

### A Core Network in the SARS-CoV-2 Nucleocapsid NTD Mediates Structural Integrity and Selective RNA-binding

Karthikeyan Dhamotharan<sup>1,2#</sup>, Sophie M. Korn<sup>1,2,3##</sup>, Anna Wacker<sup>2,4</sup>, Matthias A. Becker<sup>2,4</sup>, Sebastian Günther<sup>5</sup>, Harald Schwalbe<sup>2,4</sup>, and Andreas Schlundt<sup>1,2,6\*</sup>

<sup>1</sup>Institute for Molecular Biosciences, Goethe University, Max-von-Laue-Str. 9, 60438 Frankfurt, Germany

<sup>2</sup>Center for Biomolecular Magnetic Resonance (BMRZ), Goethe University, Frankfurt/M., Germany

<sup>3</sup>Columbia University, Department of Biochemistry and Molecular Biophysics, 701W 168<sup>th</sup> Street, 10032 New York, NY, United States

<sup>4</sup>Institute for Organic Chemistry and Chemical Biology, Goethe University, Frankfurt/M., Germany

<sup>5</sup>Center for Free-Electron Laser Science CFEL, Deutsches Elektronen-Synchrotron DESY, Notkestr. 85, 22607, Hamburg, Germany

<sup>6</sup>University of Greifswald, Institute of Biochemistry, Felix-Hausdorff-Str. 4, 17489 Greifswald, Germany.

#These authors contributed equally.

\*Correspondence. **Email:** [smk2305@cumc.columbia.edu](mailto:smk2305@cumc.columbia.edu), [andreas.schlundt@uni-greifswald.de](mailto:andreas.schlundt@uni-greifswald.de)

This document contains:

- 11 Supplementary Figures
- 4 Supplementary Tables
- Supplementary References

## Supplementary Fig. 1

**a**

May 2024

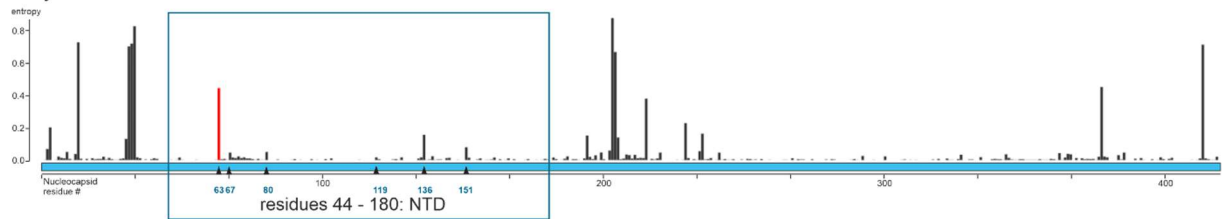

**b**

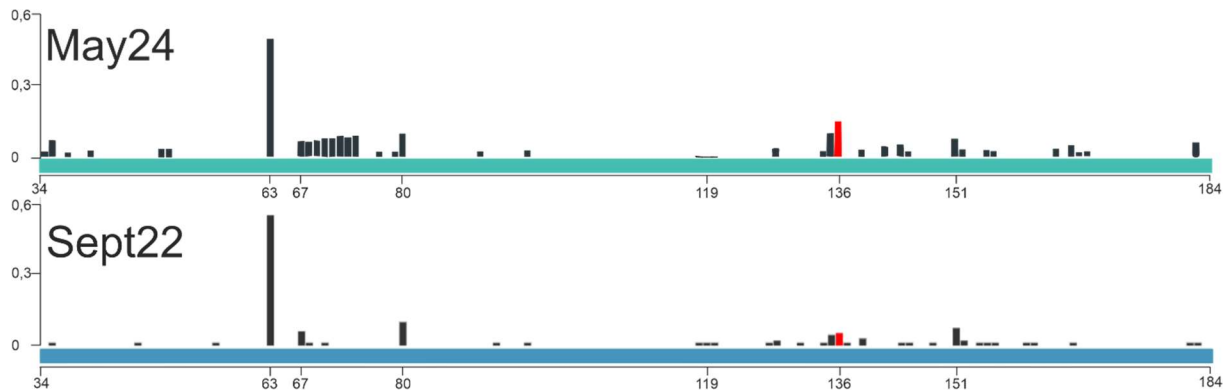

**c**

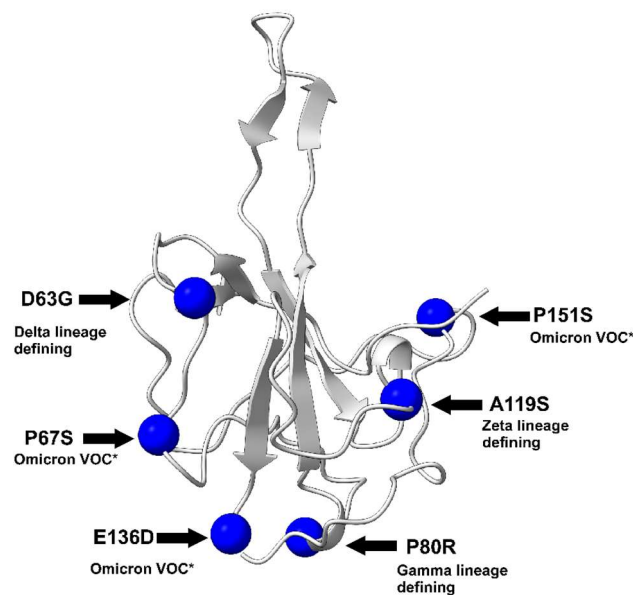

**Supplementary Fig. 1: Naturally occurring mutants in the SARS-CoV-2 Nucleocapsid NTD (boundaries aa 44-180).** **a)** Mutations in the Nucleocapsid coding sequence (codon sequence: x axis) are depicted according to their respective normalized Shannon entropies (y axis). The blue box comprises codons 44-180, corresponding to the NTD. The red bar shows the entropy of codon 63 representing the highest value inside the NTD (0.46). See methods for details. **b)** Comparison of Shannon entropies (y axes) for mutations in the NTD coding sequence (codon sequence: x axis), calculated for May 2024 (top) versus September 2022 (bottom). The red bars show the entropy of codon 136, corresponding to the E136D mutation, at the time points of 9/22/2022 (0.05) and 5/16/2024 (0.13). **c)** Shown on our WT\_NTD crystal structure in spheres are C $\alpha$  atoms in respective sites of mutations. The correlated viral strain is indicated. For details on mutant selection, see methods section. Three of the mutations D63G, P80R, and A119S were specific to Delta (PANGO lineage B.1.617.2), Gamma (PANGO lineage P.1) and Zeta (PANGO lineage P.2) strains of SARS-CoV-2, respectively and were lineage-defining. Three of the mutations P67S (PANGO lineage BA.1.20), E136D (PANGO lineage BE.1.1) and P151S (PANGO lineage BA.4) belonged to circulating Omicron variants of concern<sup>1</sup>.

Supplementary Fig. 2

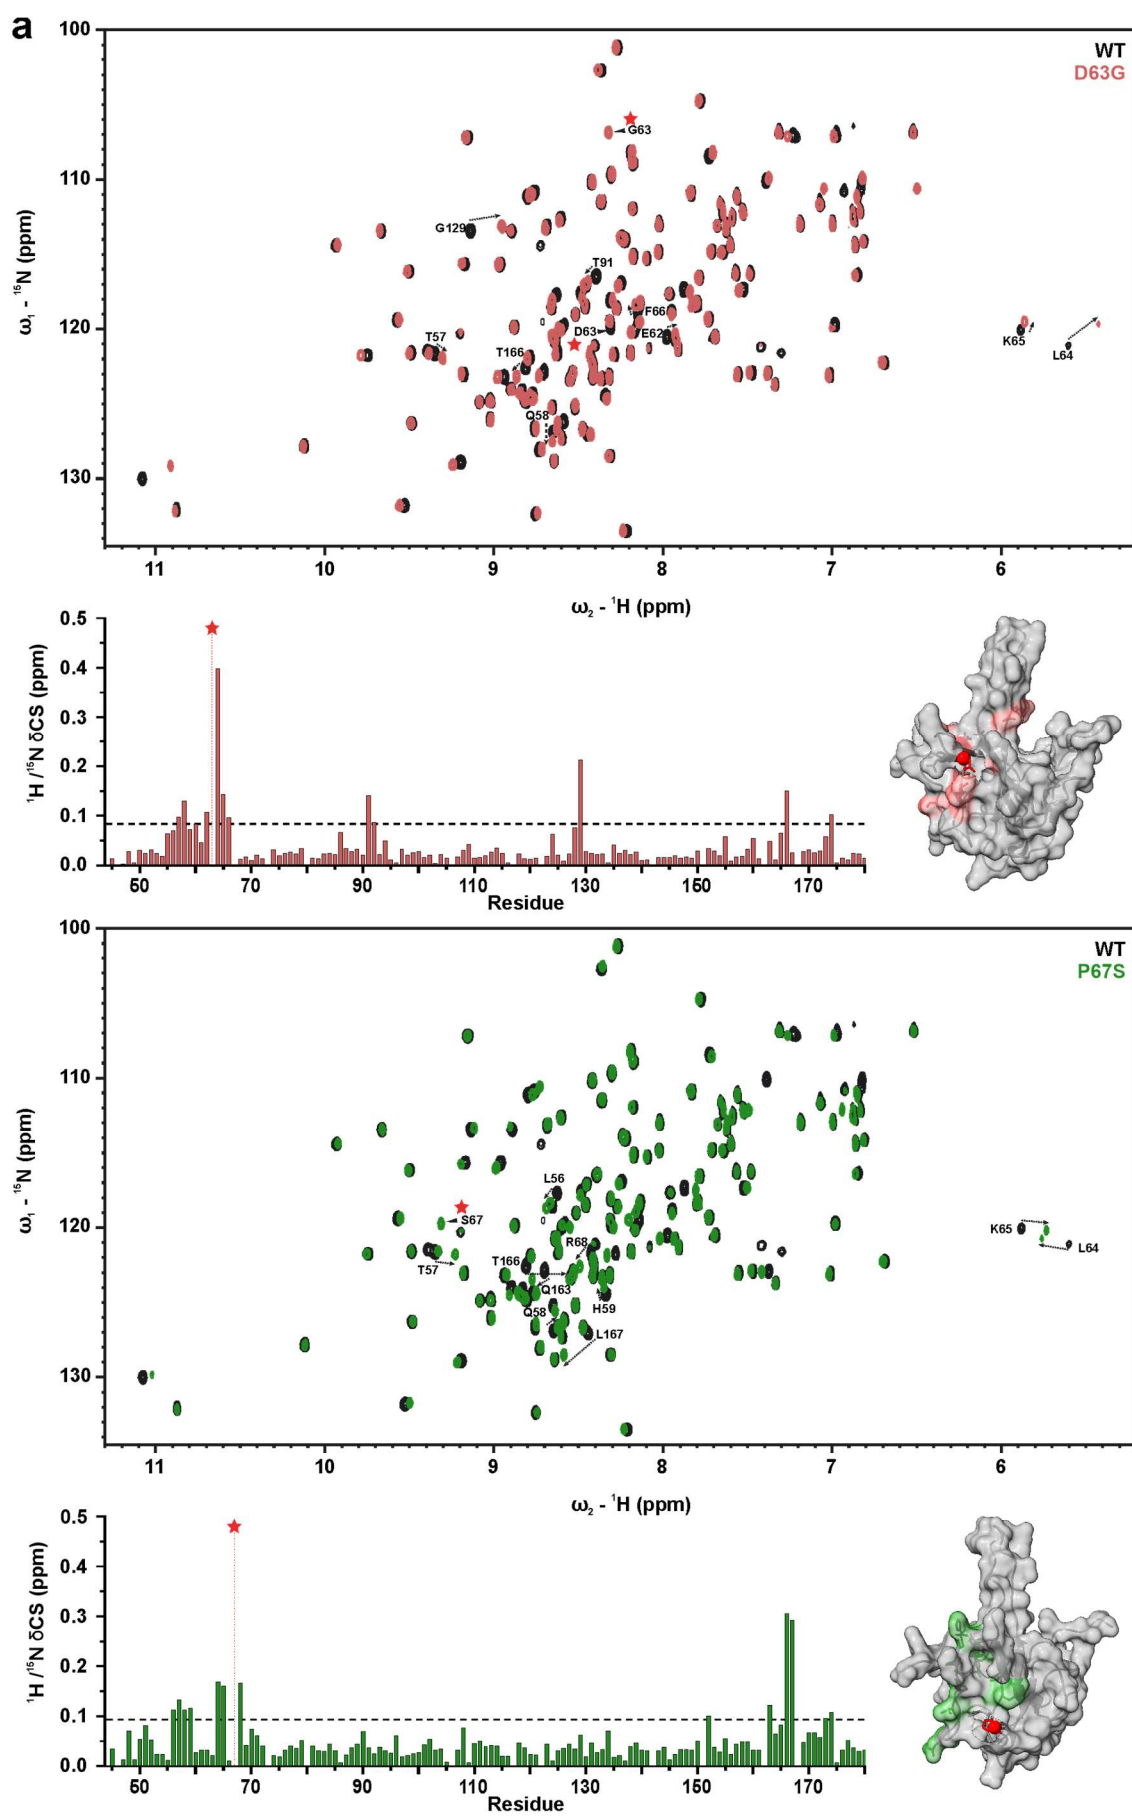

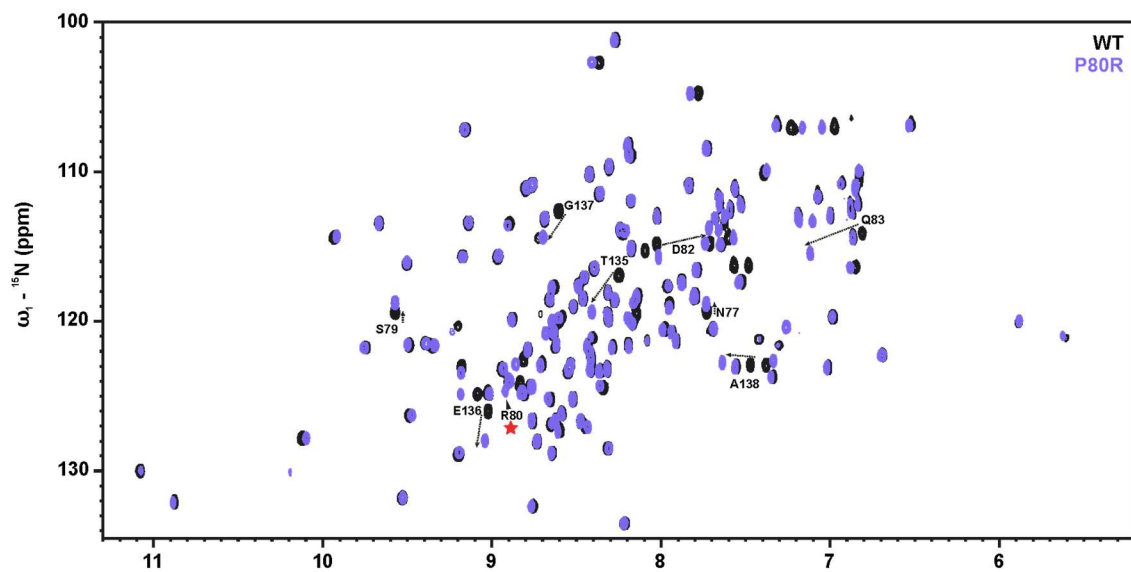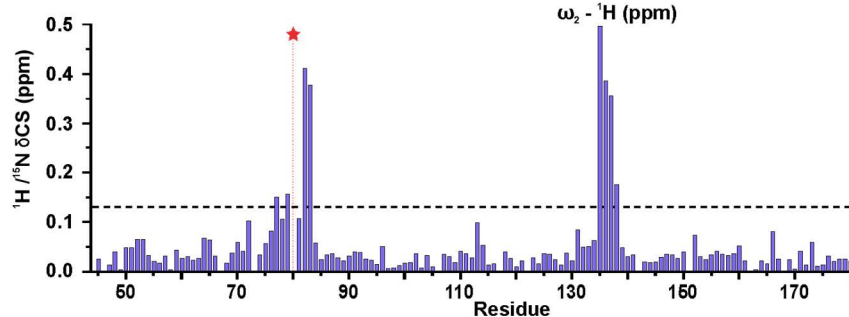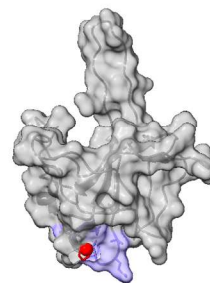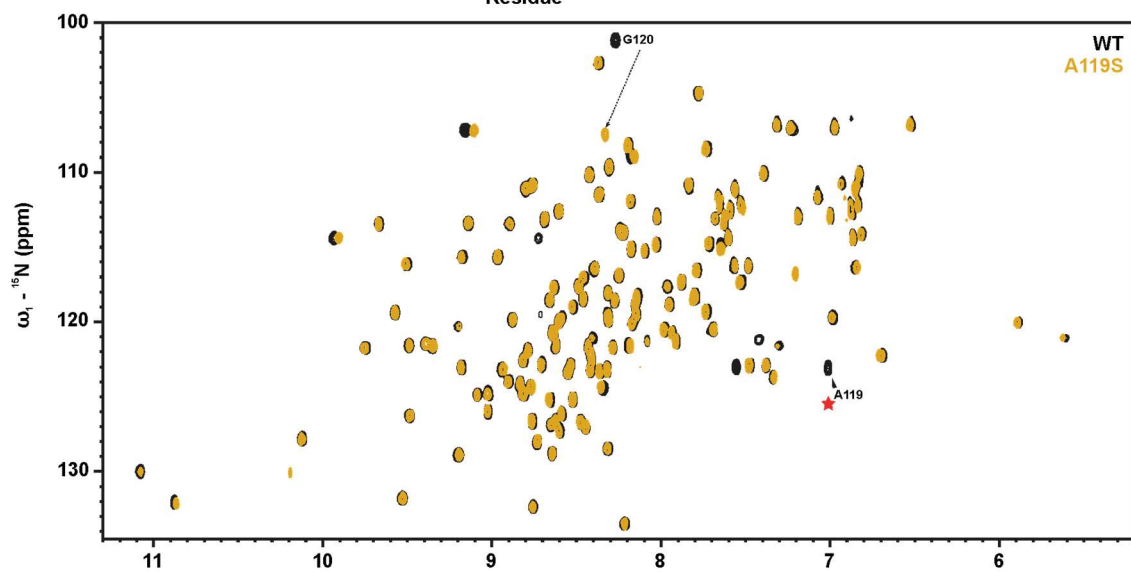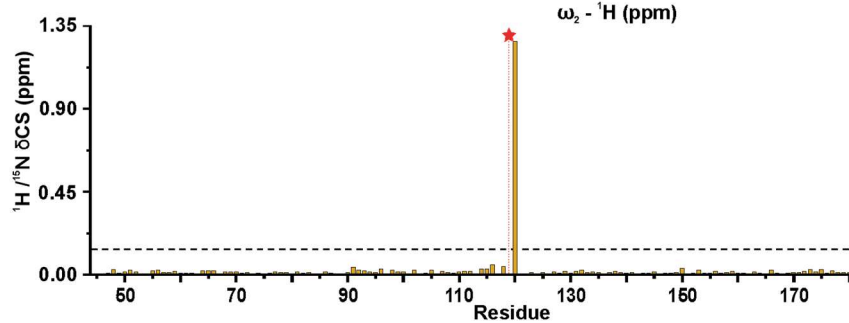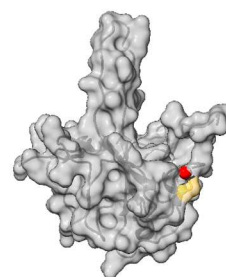

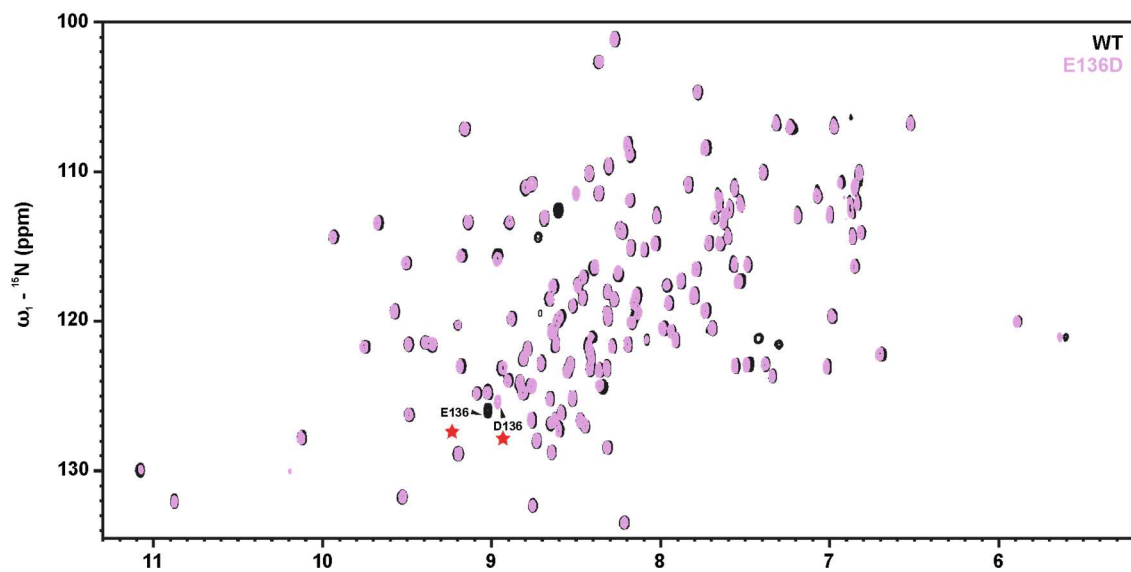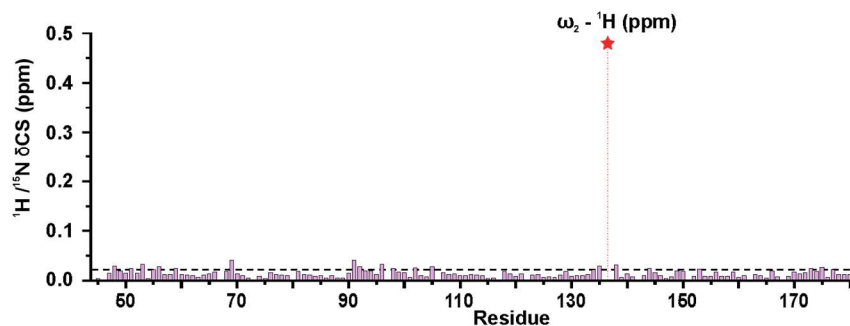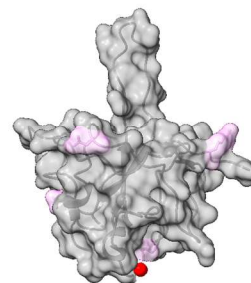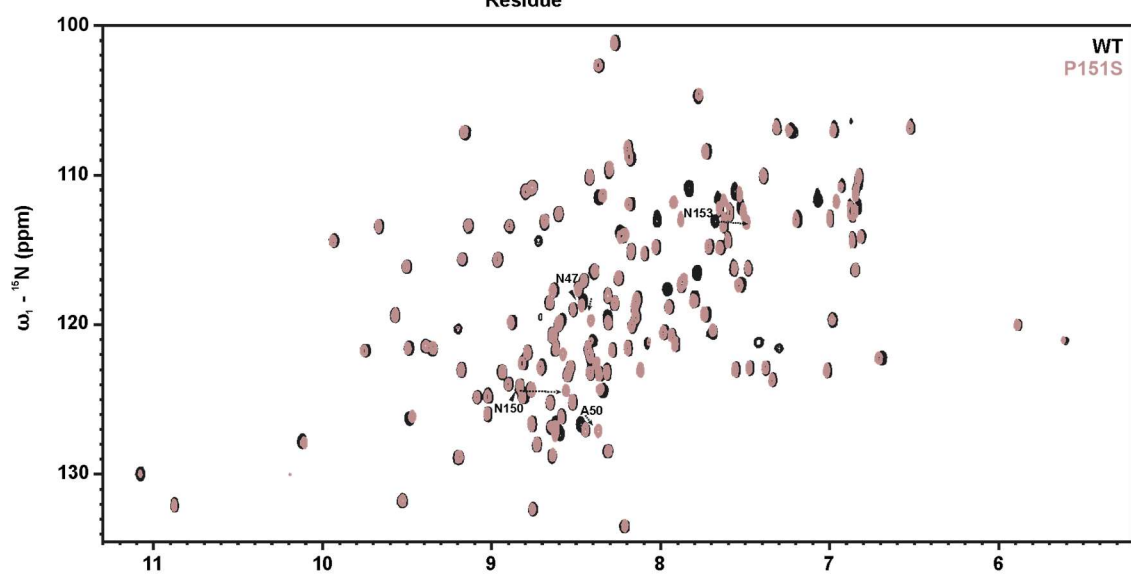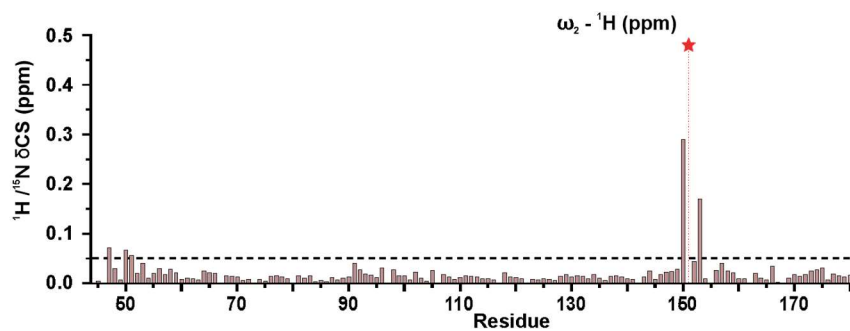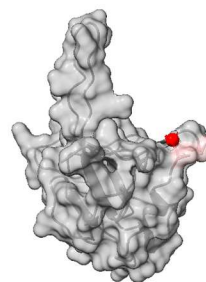

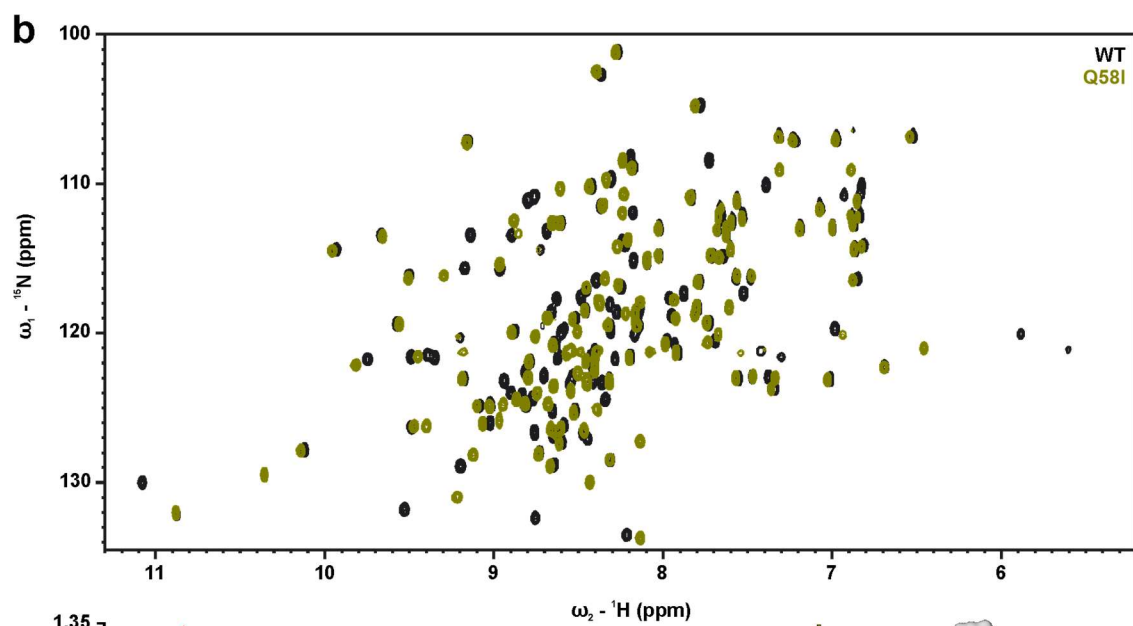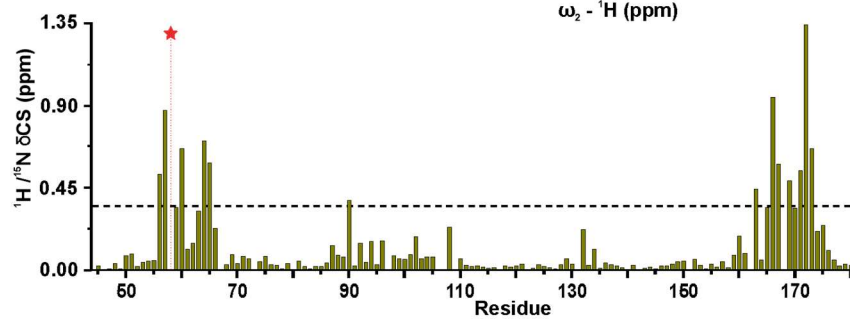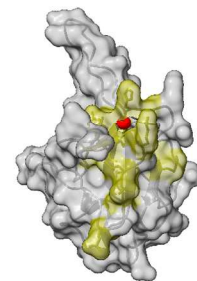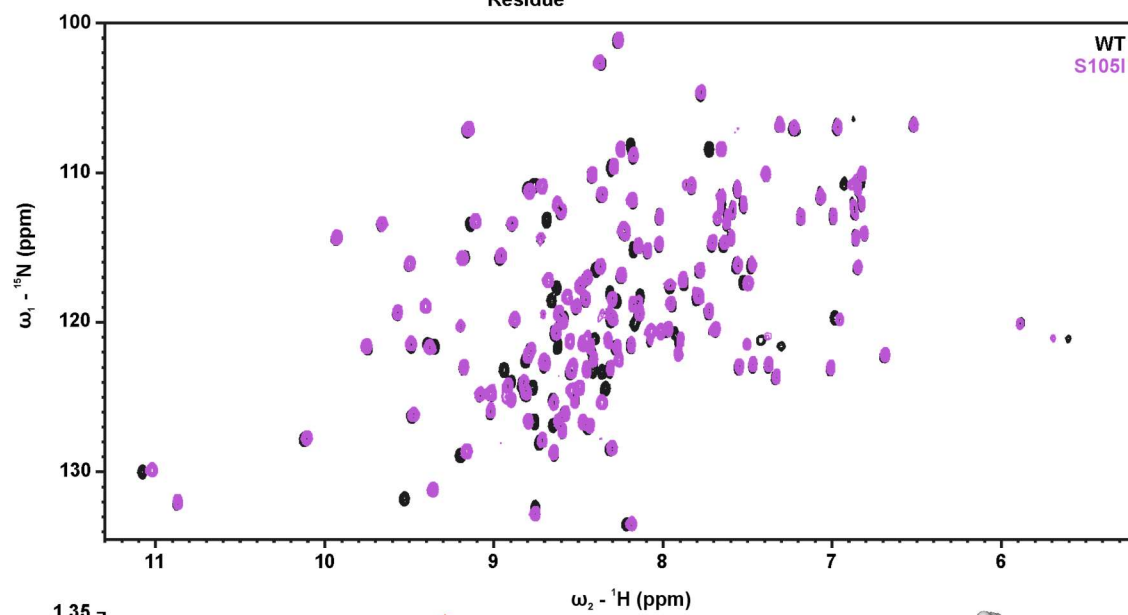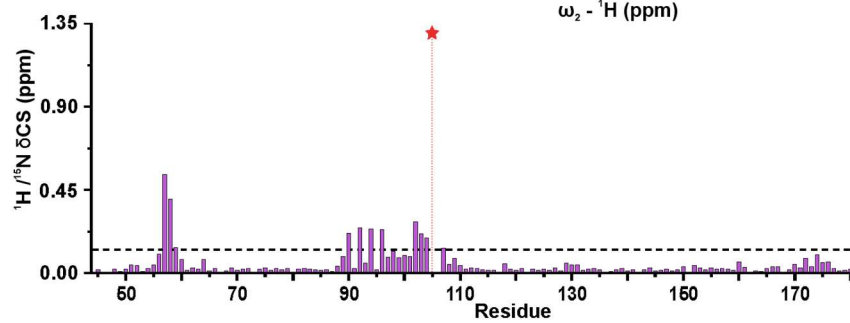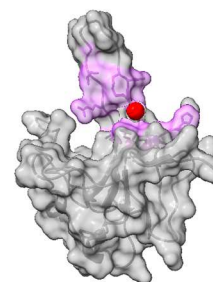





**d**

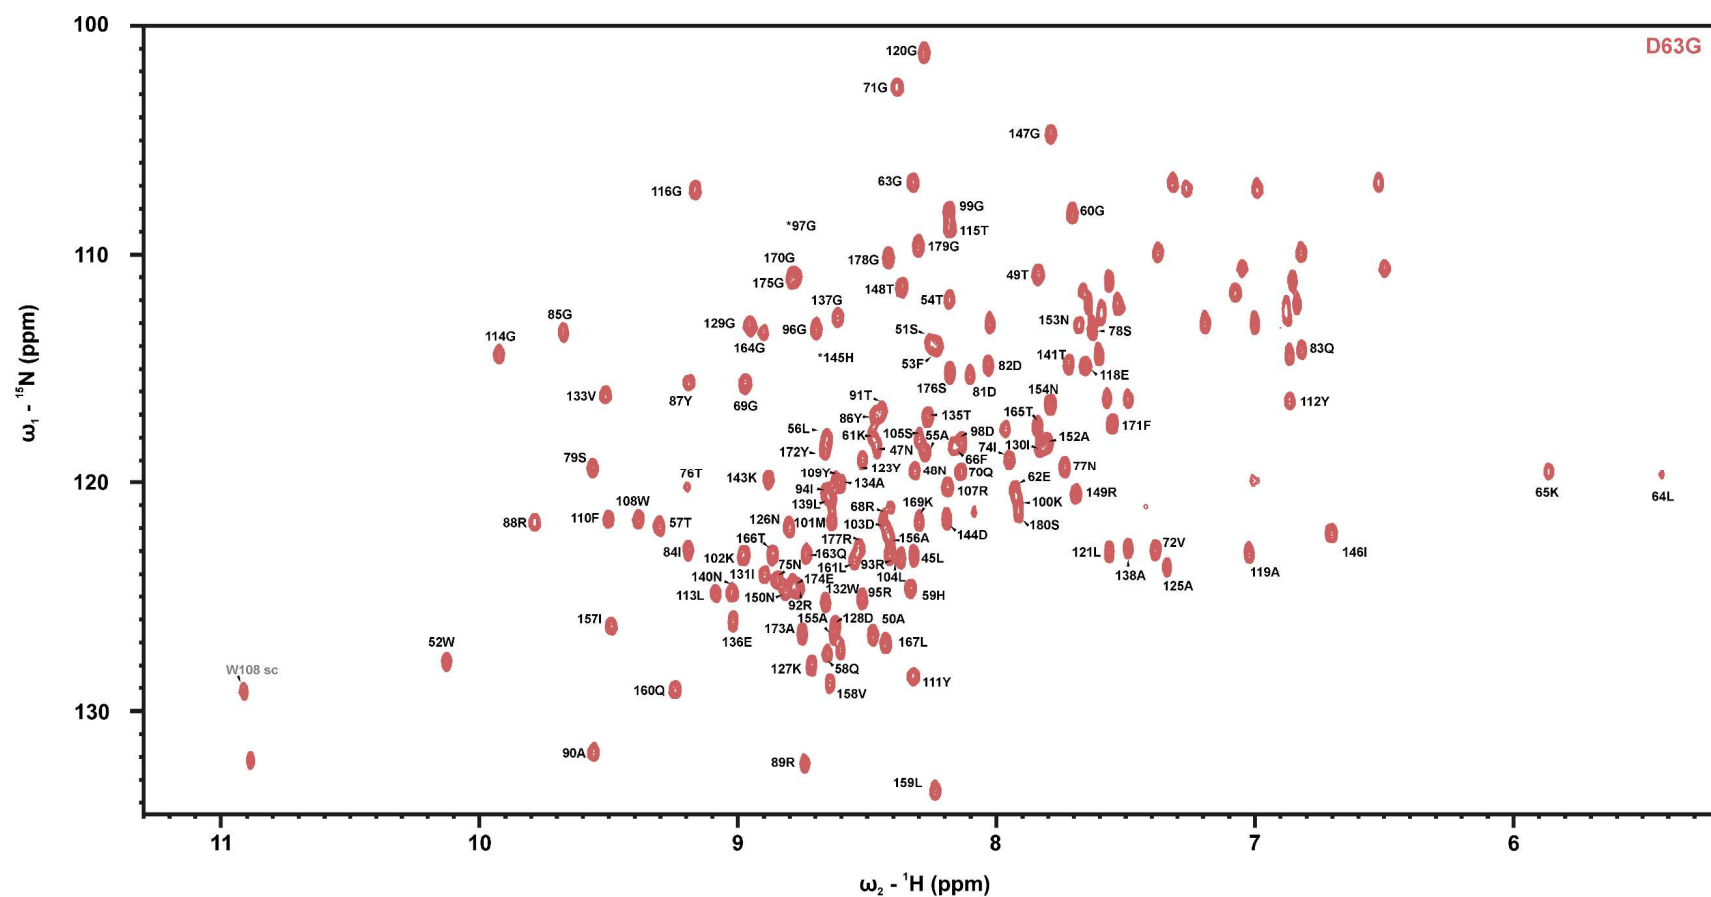



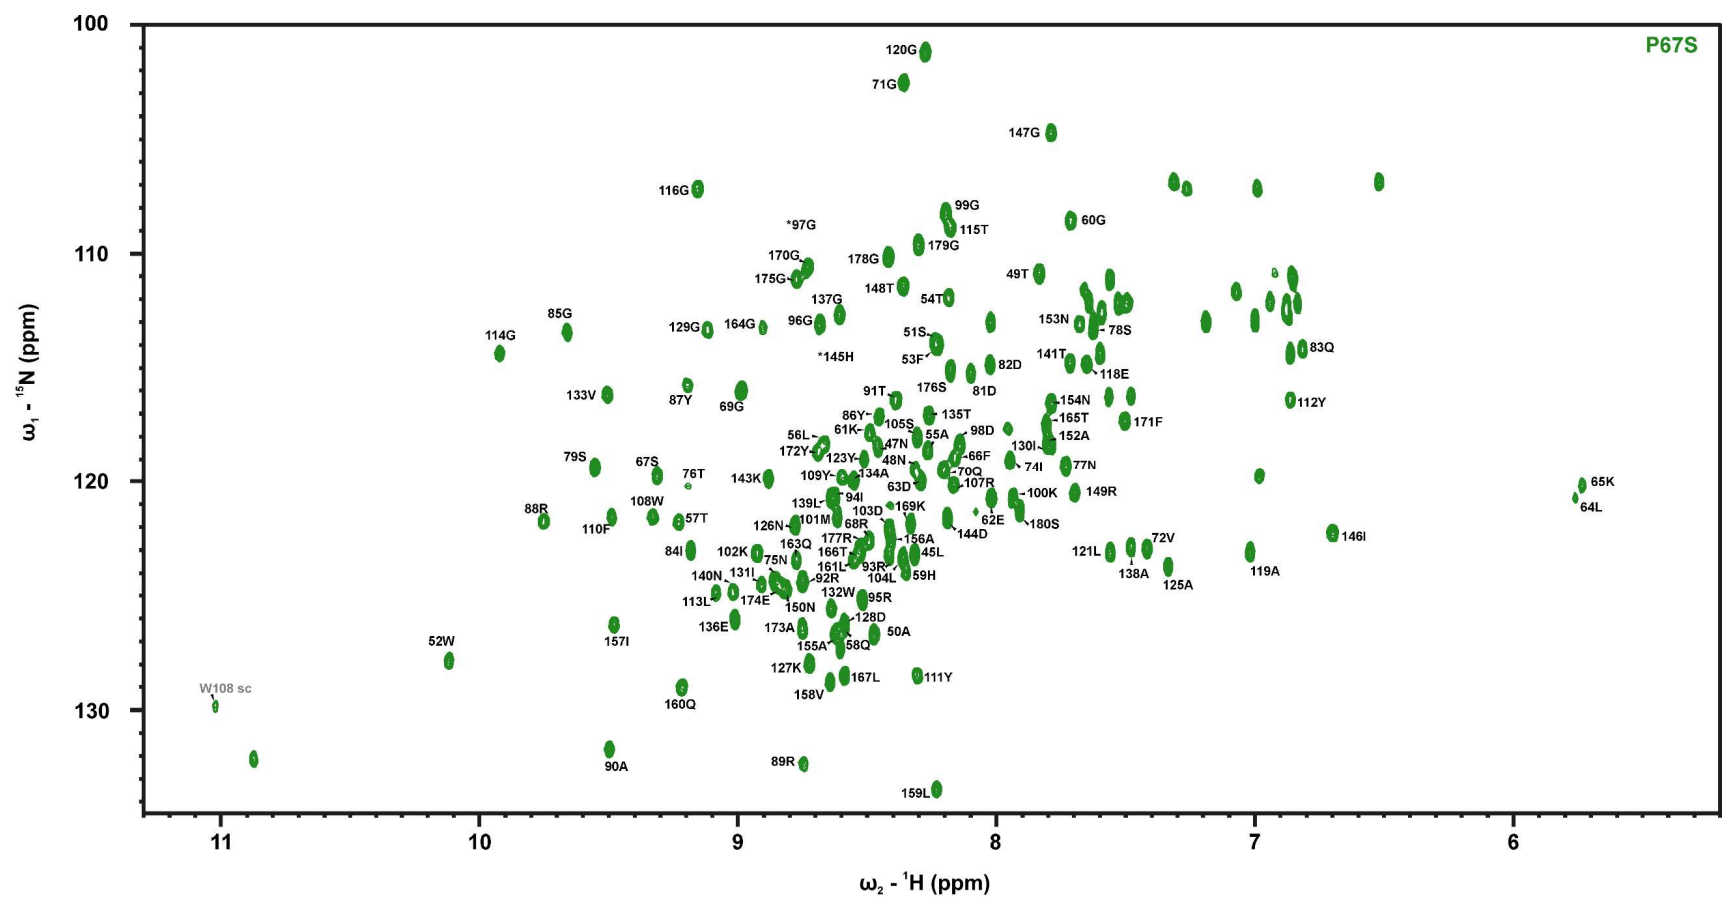

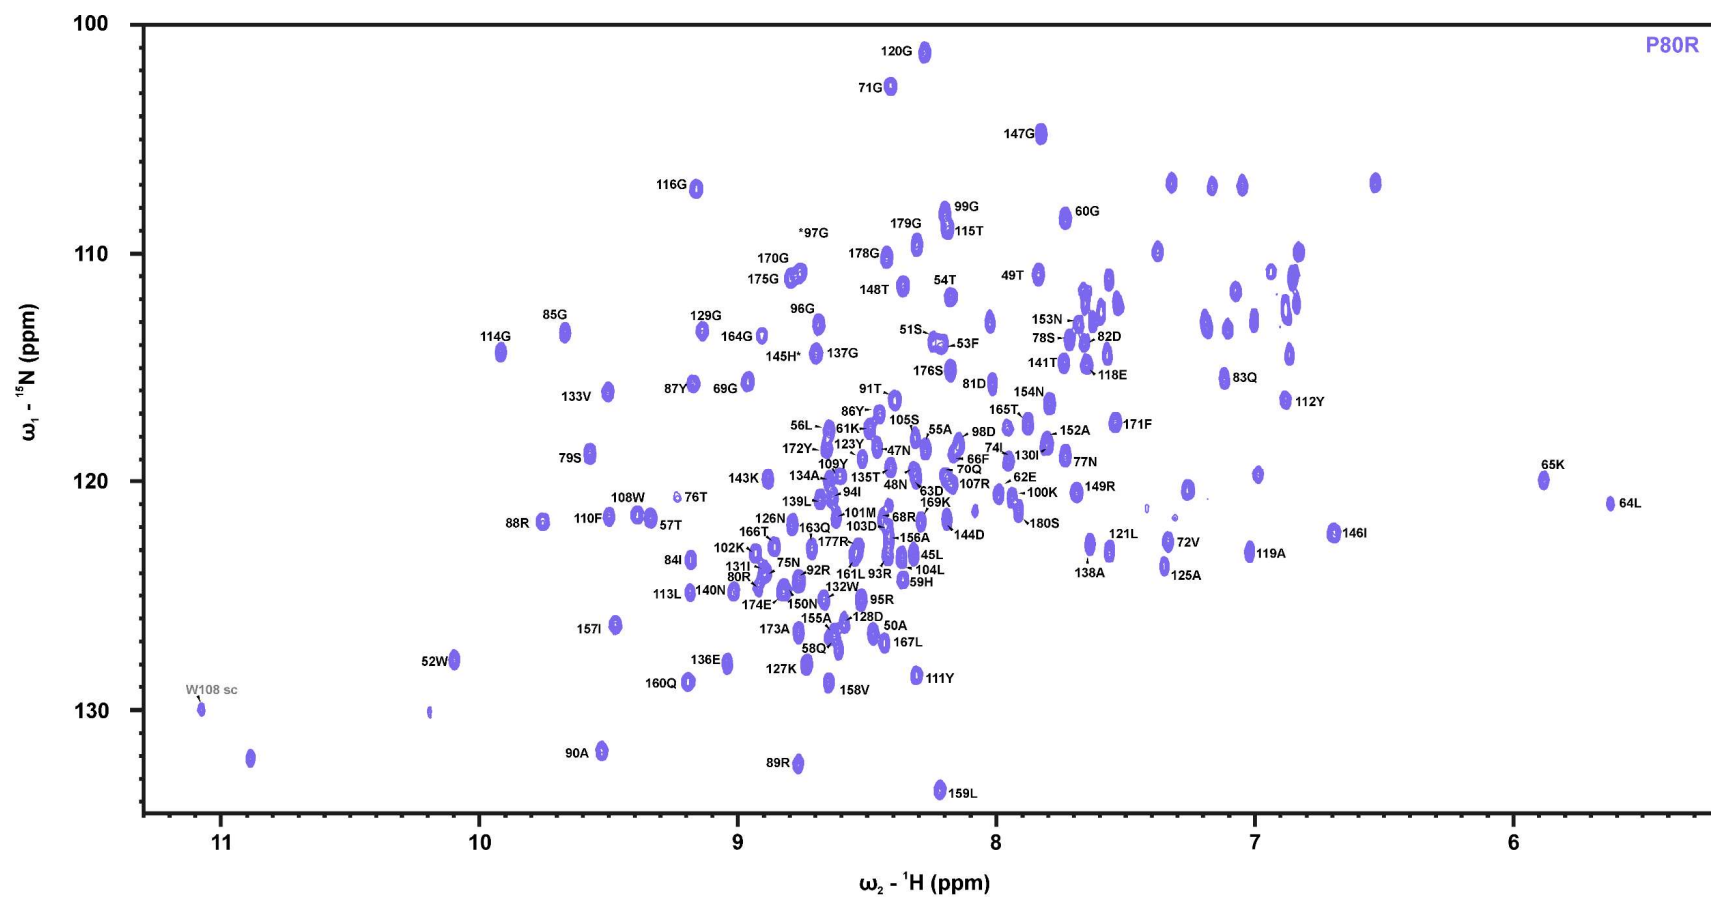

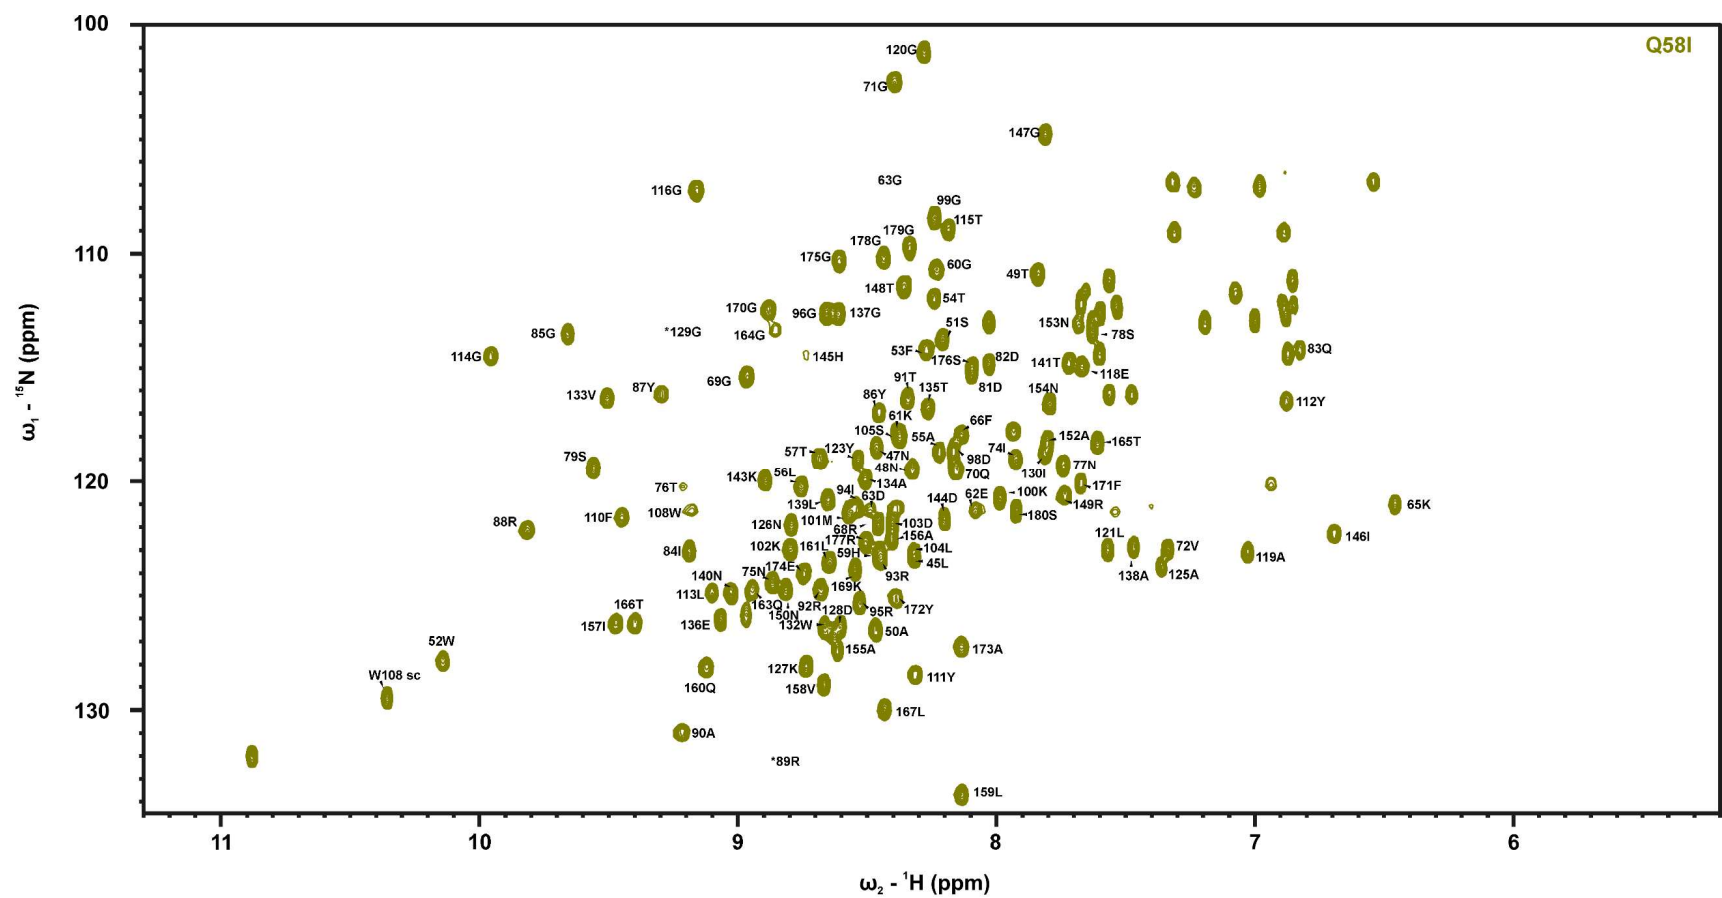

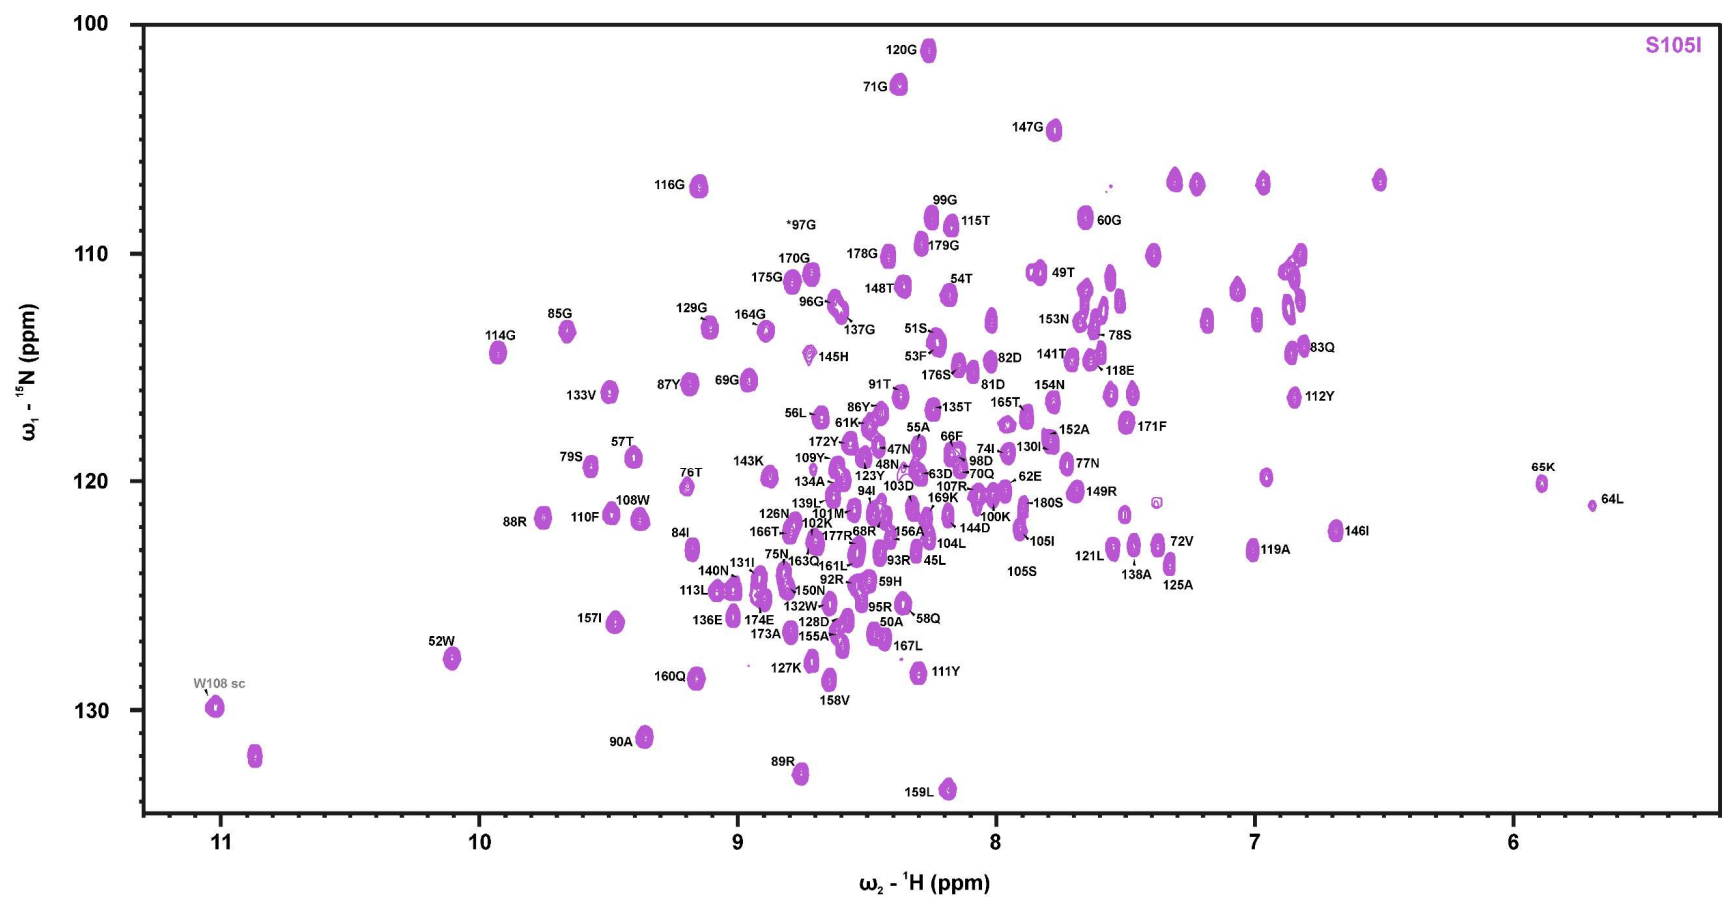



Supplementary Fig. 3

a

**D63G**

RMSD 0.668 Å

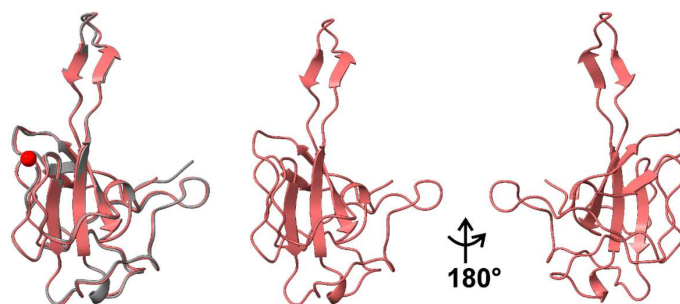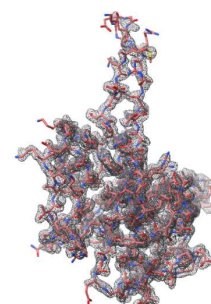

**P67S**

RMSD 1.047 Å

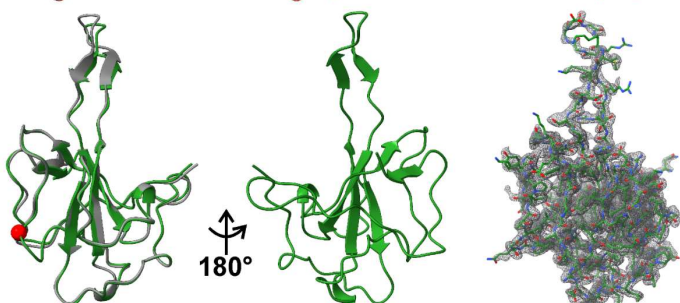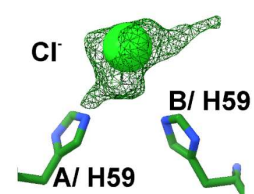

**P80R**

RMSD 0.898 Å

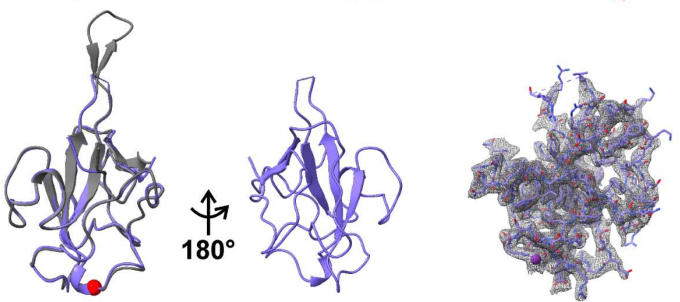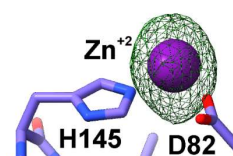

**A119S**

RMSD 0.592 Å

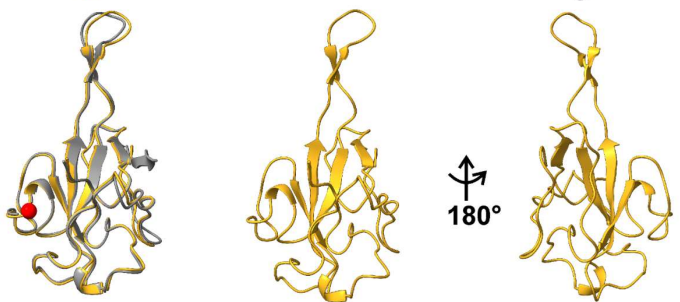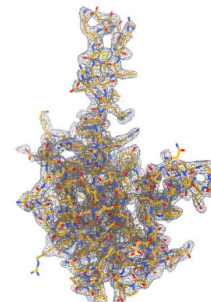

**E136D**

RMSD 0.766 Å

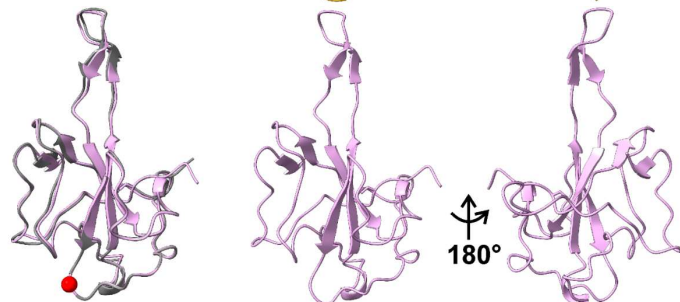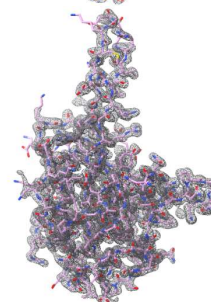

**P151S**

RMSD 1.776 Å

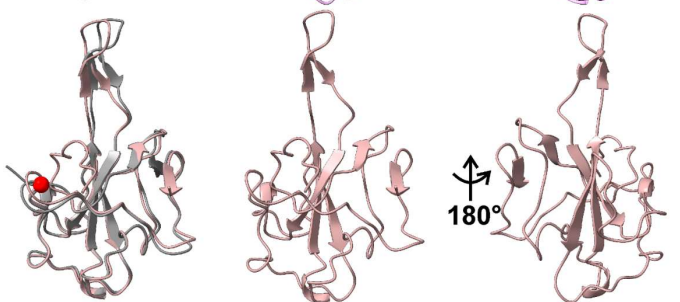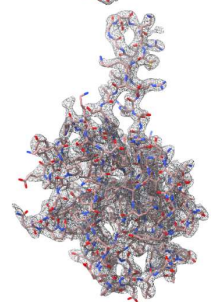



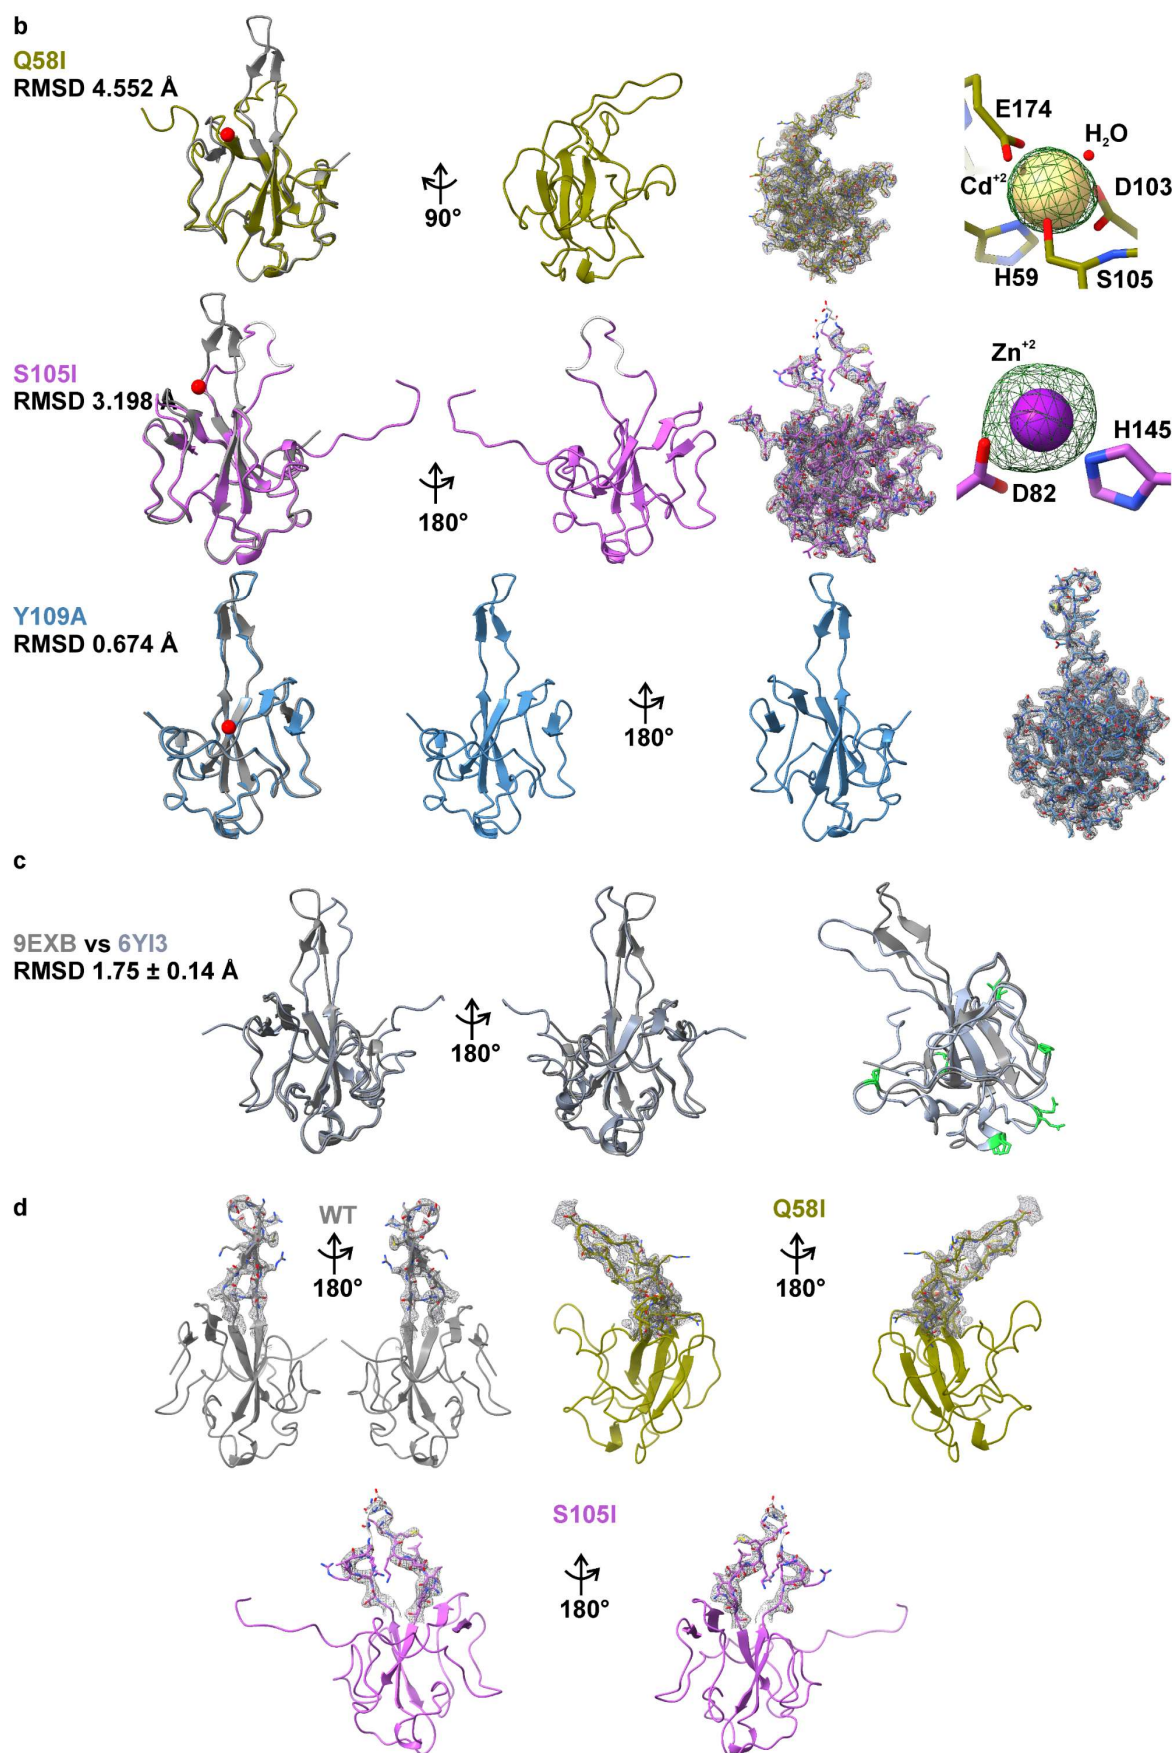

**Supplementary Fig. 3: High resolution crystal structures of NTD mutants. a)** Overlay of crystal structures of nat\_mutants (in color) and **b)** des\_mutants and their respective root mean square deviations to WT structure (in

grey). The C $\alpha$  at the site of mutation is shown as red sphere on WT structure. The structures of the mutants are shown from two perspectives on the right. Missing  $\beta$ -hairpin residues in the structures of NTD\_P80R and NTD\_S105I are depicted as broken lines. 2mFo-DFc map (in gray) shows the electron density at  $1\sigma$  for the protein chain and mFo-DFc map (in green) at  $3\sigma$  for ligand. Residues and water coordinating the bound metal ion are labelled. **c)** Overlay of the WT crystal structure from this study (Chain C) to the NMR structure (model 35). The average RMSD between the 4 chains in the WT crystal structure and the 40 conformers in the NMR structure (excluding highly flexible residues 89 to 107) is given with standard deviation. Highlighted in green stick representation are the residues of nat\_mutations in both NMR and crystal structure. **d)** Crystal structures of WT, Q58I and S105I with electron density (2mFo-DFc) shown in gray at  $1\sigma$  for residues 89 to 107 from two perspectives. Continuous density allowed complete model building of loop residues 89 to 107 (represented as sticks) in WT and Q58I. For S105I, residues 94 to 102 were modelled for completeness but lack uniform and continuous experimental electron density. In the region between 94 and 102, residues are shown in white (no electron density) and color (electron density below  $1\sigma$ ).

**Supplementary Fig. 4**

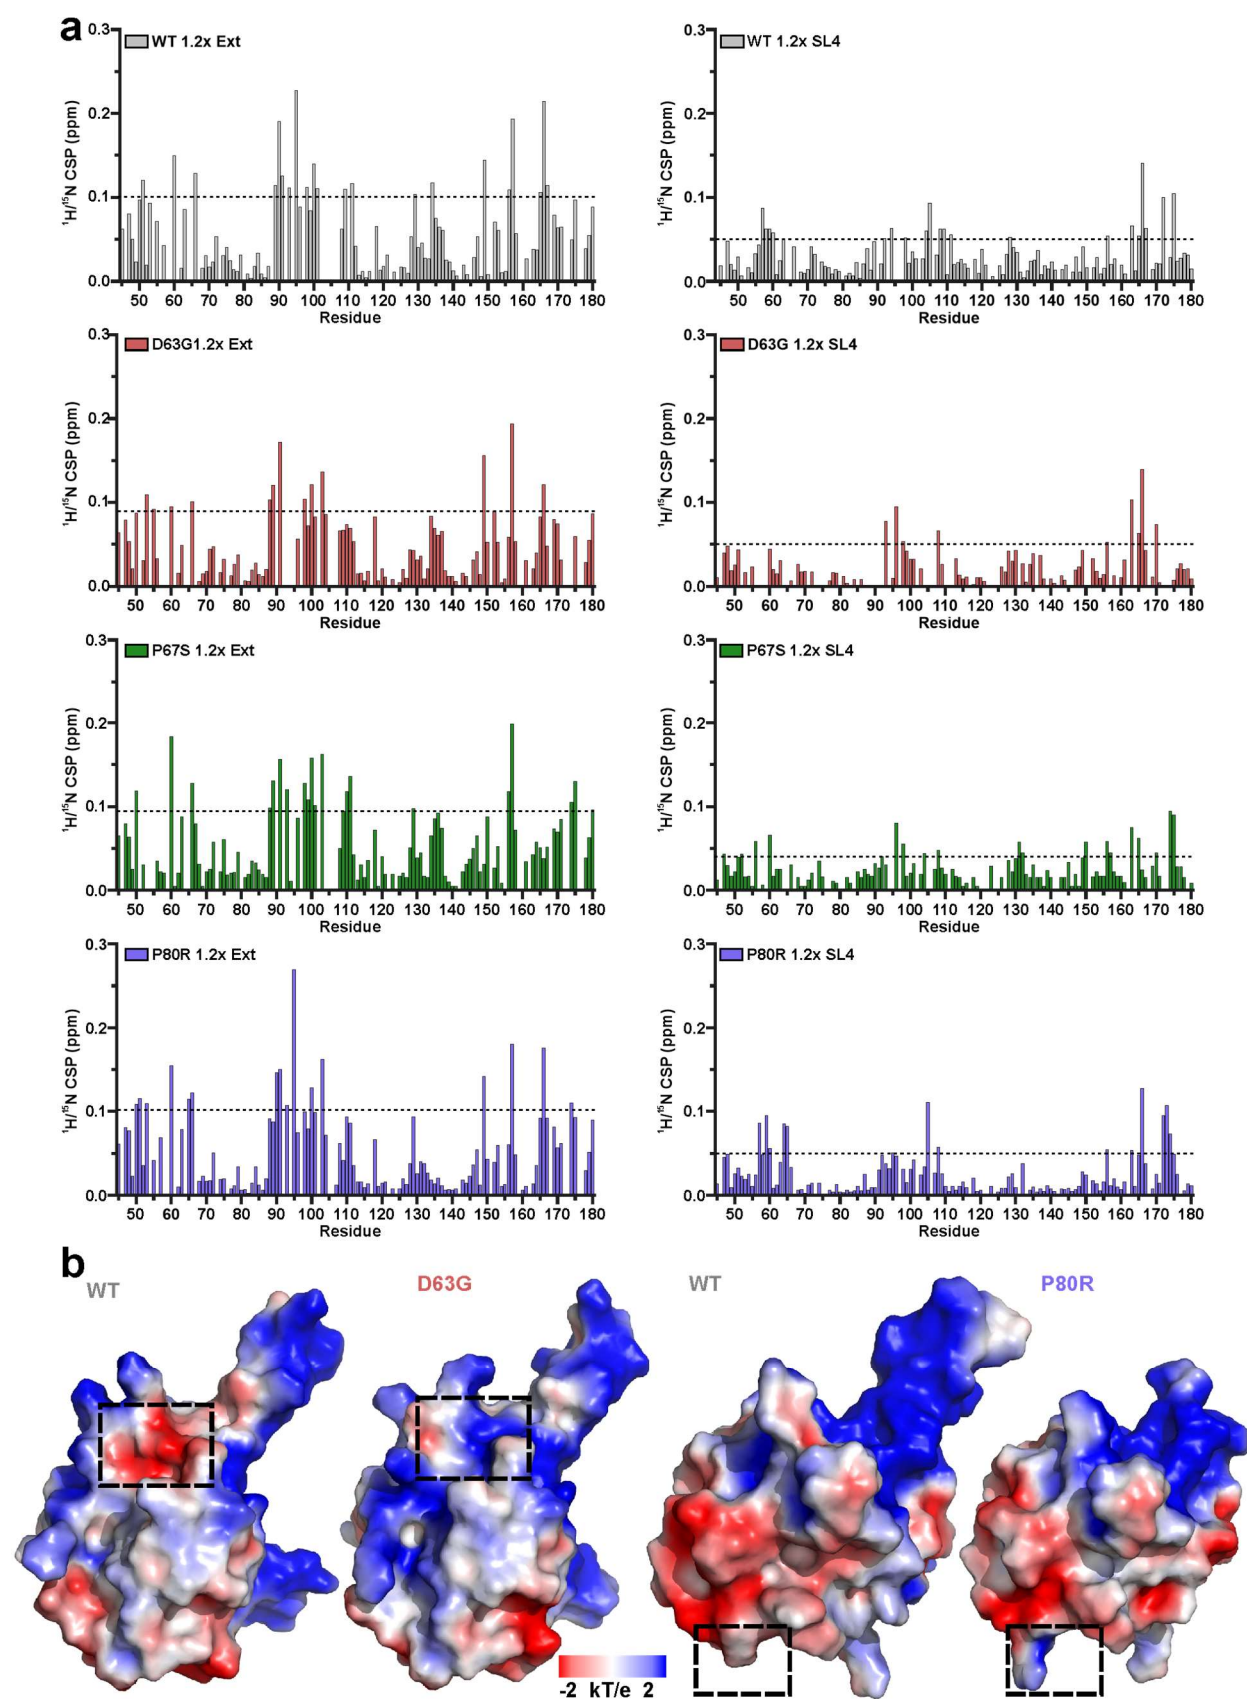

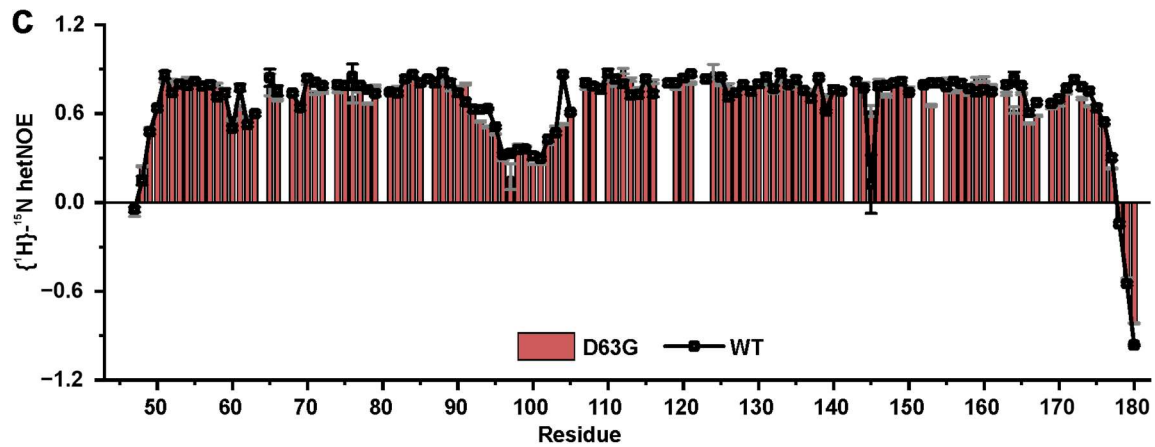

**Supplementary Fig. 4:** **a)**  $^1\text{H}/^{15}\text{N}$  CSP plots for D63G, P80R and WT comparing apo proteins and their complexes with 1.2 equivalents of SL4 and Ext RNA, respectively. The threshold for significance of CSPs (average + 1 SD) is indicated by a dotted line. **b)** Electrostatic surface potential of WT compared to that of D63G and P80R obtained from Pymol APBS plugin<sup>5</sup>. Area around the site of mutation is highlighted by a dashed box. **c)**  $\{^1\text{H}\}-^{15}\text{N}$  hetNOE comparison of D63G (as bars in color with error bars in gray) and WT (as squares with error bars in black). Error bars represent the intensity ratio of saturated over unsaturated peaks, respectively, considering the local noise of each peak according to equation 4 in the Methods section. Spectra were recorded with 750  $\mu\text{M}$  of protein at a 600 MHz spectrometer, at 298 K. Prolines and peaks that were line-broadened beyond detection appear as gaps in the plot.

# Supplementary Fig. 5

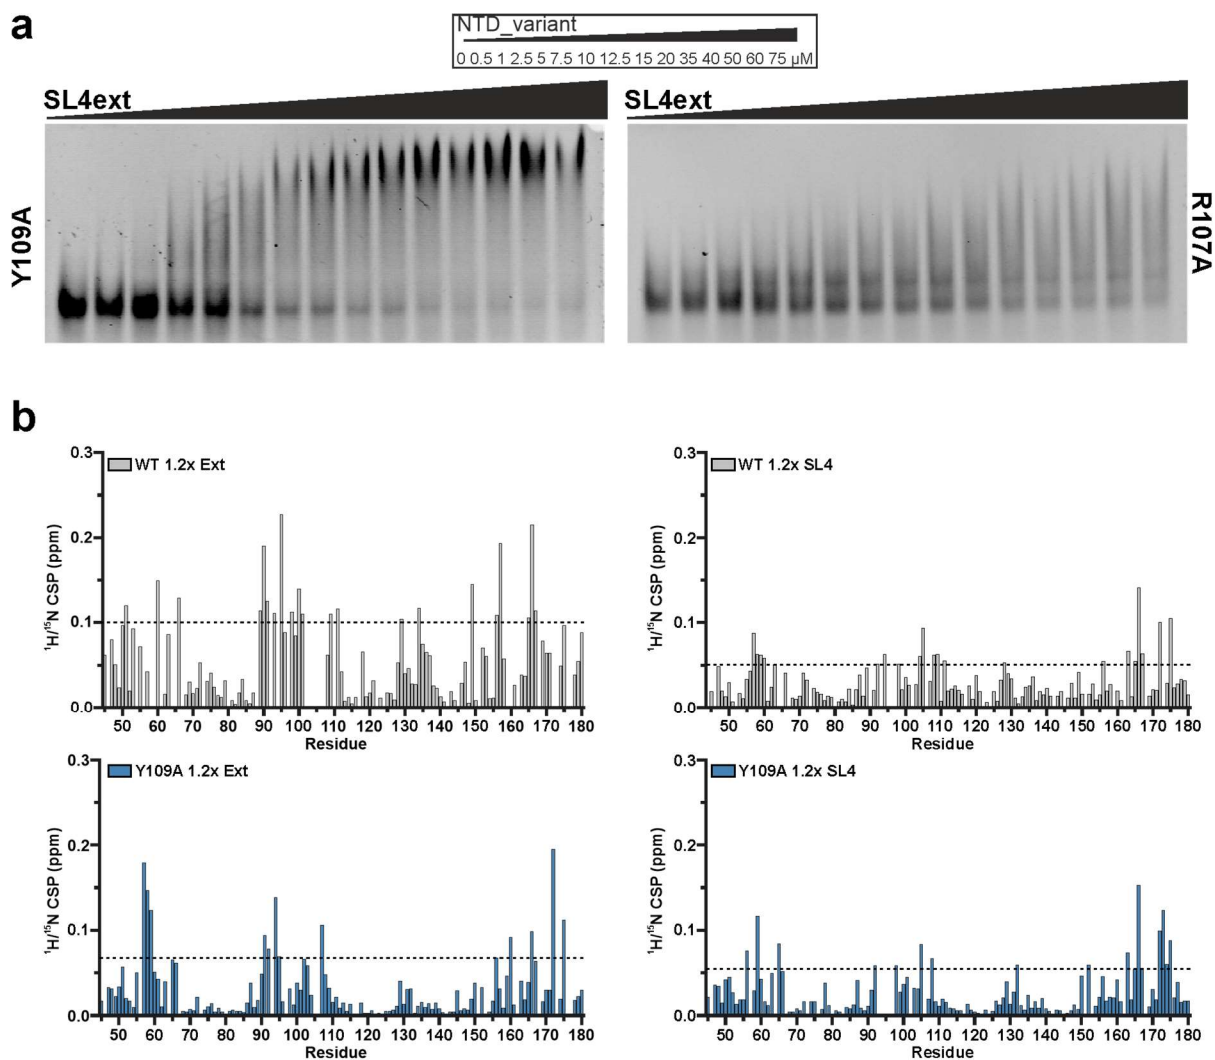

**Supplementary Fig. 5:** **a)** Qualitative EMSAs with des\_mutants Y109A and R107A. SL4ext RNA (3  $\mu$ M) has been incubated with increasing concentrations of protein as indicated above. **b)**  $^1\text{H}/^{15}\text{N}$  CSP plots for Y109A and WT, respectively, in complex with either 1.2 equivalents of Ext or SL4 at a 600 MHz spectrometer at 298 K. Prolines and peaks that were line-broadened beyond detection appear as gaps in the plot. The threshold for significance of CSPs (average + 1 SD) is indicated by a dotted line.

**Supplementary Fig. 6**

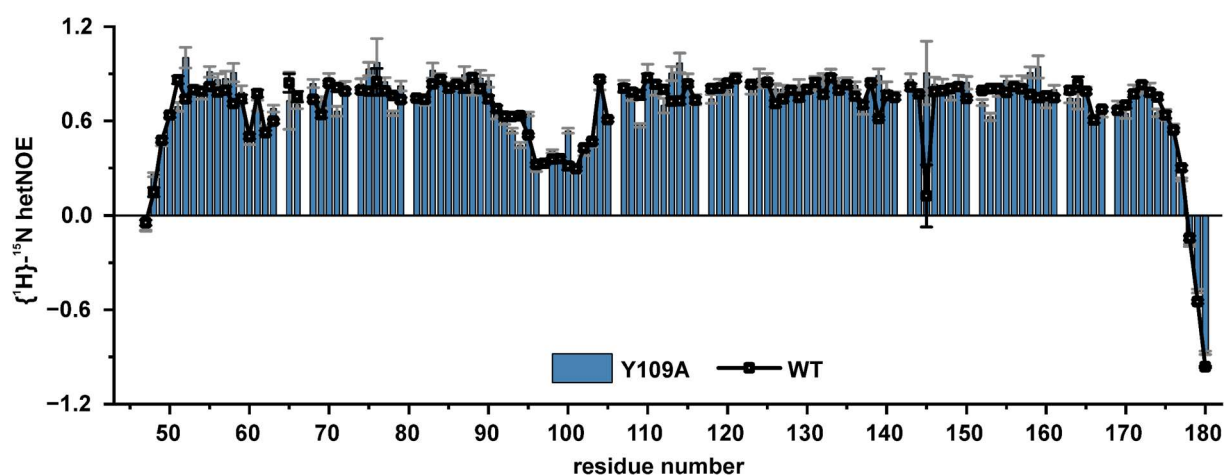

**Supplementary Fig. 6:**  $\{^1\text{H}\}\text{-}^{15}\text{N}$  hetNOE comparison of Y109A (as bars in color with error bars in gray) and WT (as squares with error bars in black). Error bars represent the intensity ratio of saturated over unsaturated peaks, respectively, considering the local noise of each peak according to equation 4 in the Methods section. Spectra were recorded for 750  $\mu\text{M}$  protein at a 600 MHz spectrometer, at 298 K. Prolines and peaks that were line-broadened beyond detection appear as gaps in the plot.



Supplementary Fig. 7

**a**

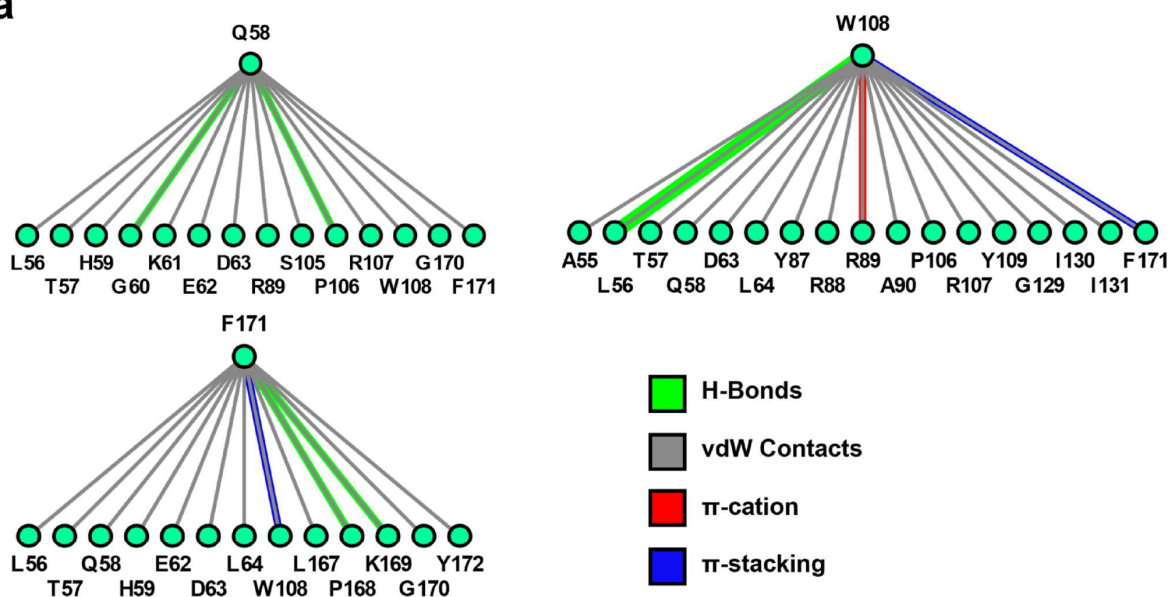

**b**

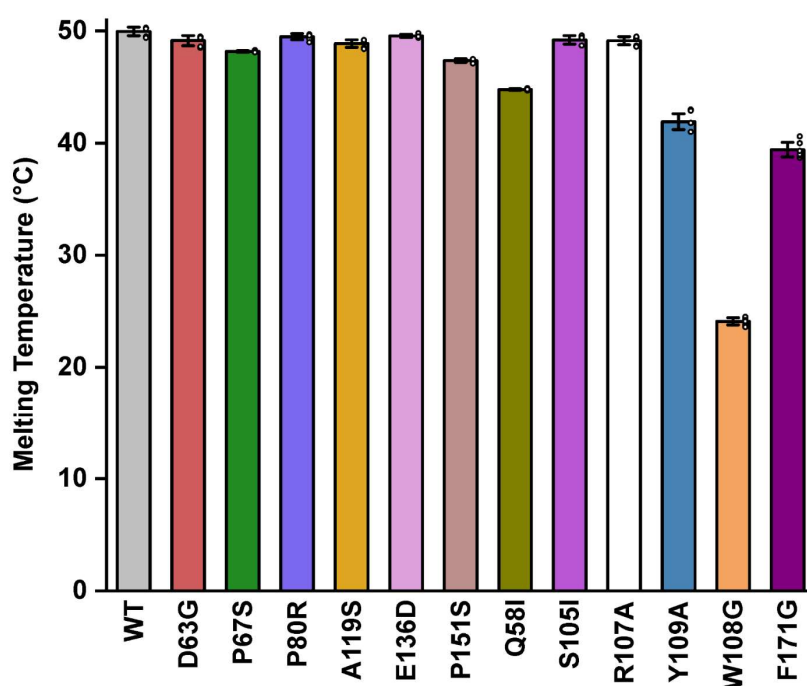

**Supplementary Fig. 7: a)** Detailed interaction map of core network residues as observed in our WT crystal structure, visualized and depicted in iCn3D<sup>6</sup>. **b)** T<sub>m</sub> values (in °C) obtained from nano-DSF measurements for WT, nat\_mutants and des\_mutants used in this study. Errors represent standard deviation (SD) from three biological replicates (N=3) each measured in duplicates with values representing the average. Individual replicates are shown as white circles to the right of the bar plot.

Supplementary Fig. 8

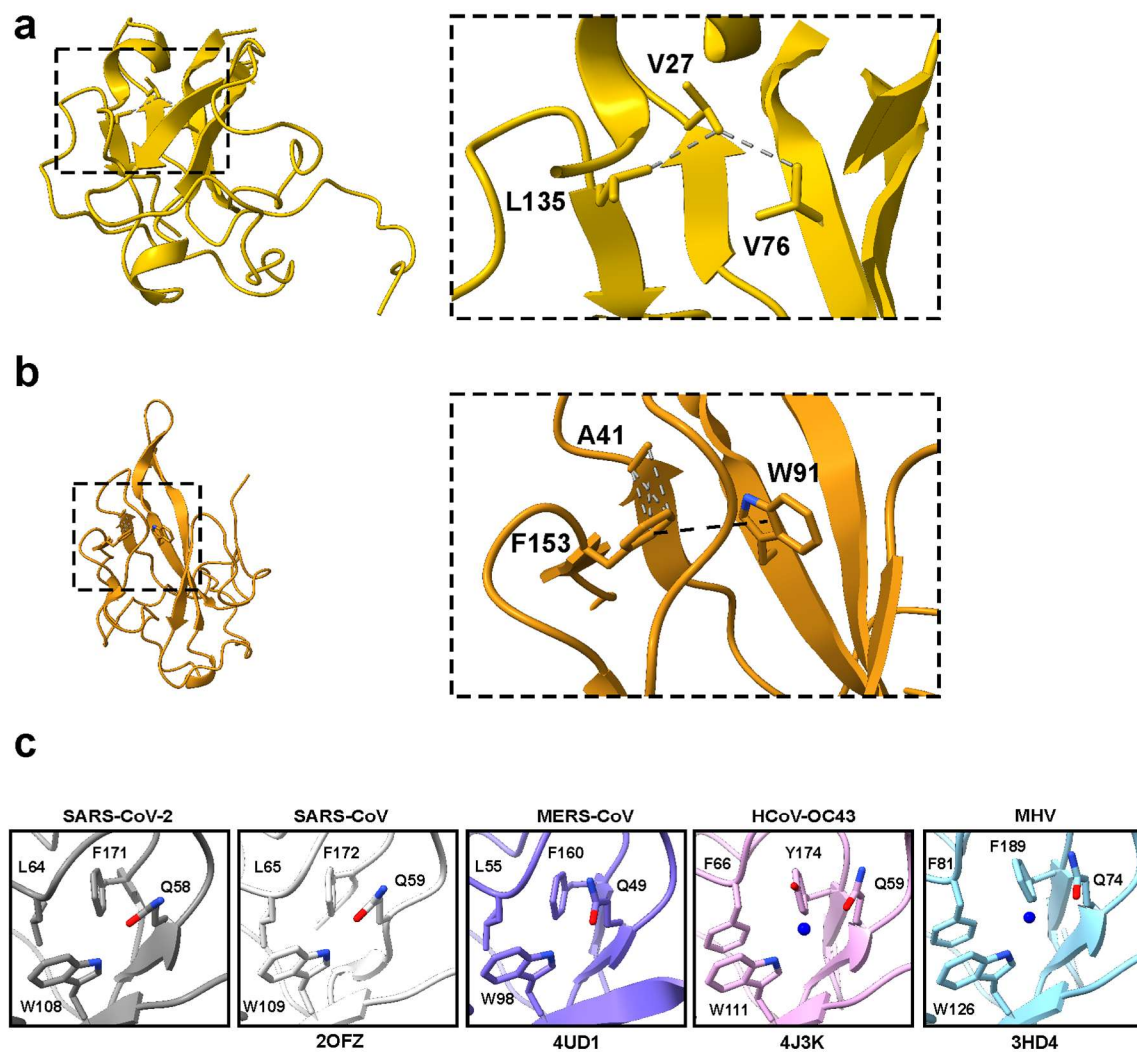

**Supplementary Fig. 8: Respective NTD core network in *Alpha*-, *Beta*- and *Gammacoronaviruses*.** **a)** Core interaction network in Human coronavirus NL63 (HCoV-NL63) 5N4K<sup>7</sup>. **b)** Core interaction network in infectious bronchitis virus (IBV) 2BXX<sup>8</sup>. Zoom-ins show residues involved in the network of interactions and the different types of contacts between them. Grey dashed lines indicate van der Waals contacts, the black dashed line shows an additional  $\pi$ - $\pi$  interactions. **c)** Zoom-ins depicting the relative orientation of core network residues (Q-W-F/(Y)) in NTD representatives from four different *Betacoronavirus* species compared to SARS-CoV-2. Water molecules that are involved in mediating contacts are shown as blue spheres.

Supplementary Fig. 9

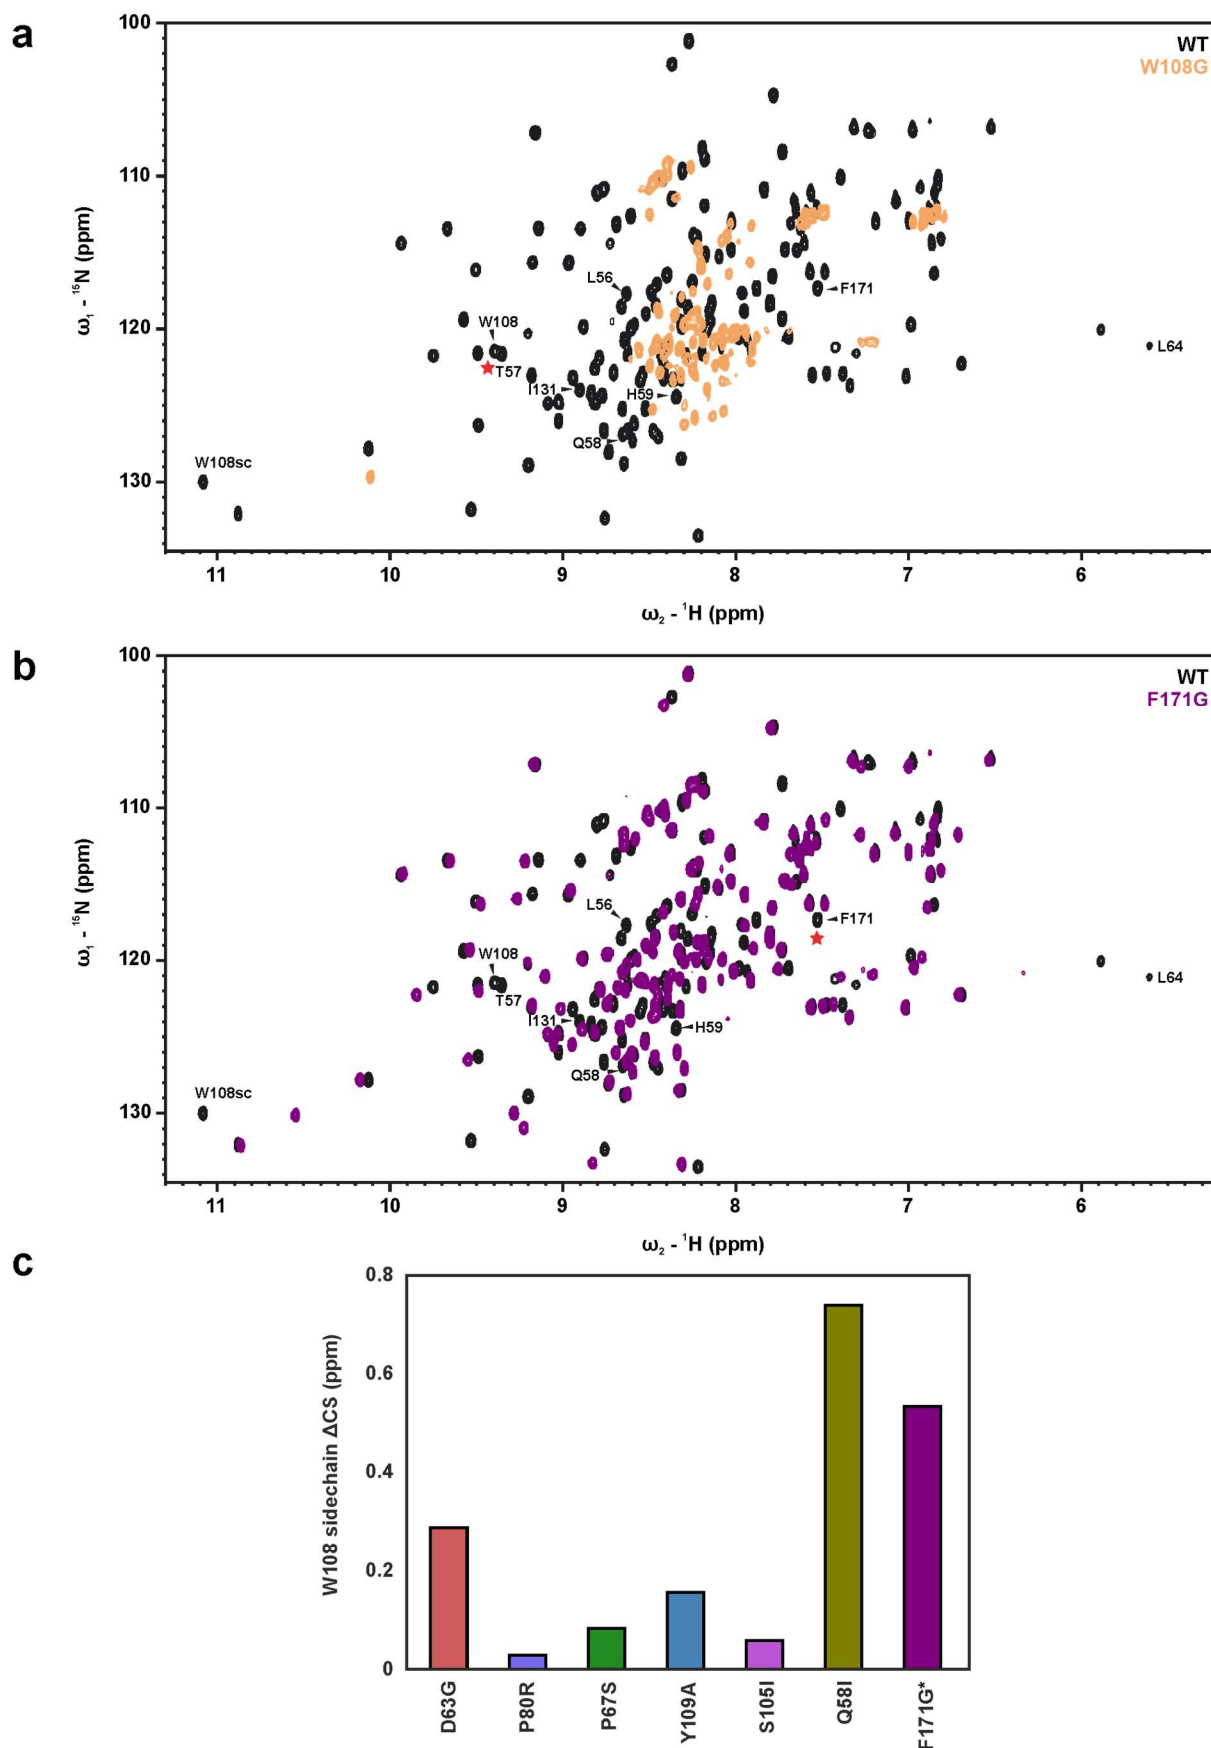

**Supplementary Fig. 9: NMR observed effects of core network-destabilizing mutations in the NTD. a)**  $^1\text{H}/^{15}\text{N}$ -HSQC overlay of WT and W108G showing that the mutation of tryptophan 108 to glycine results in a highly unstable protein prone to precipitation at 298 K even at low concentrations. **b)**  $^1\text{H}/^{15}\text{N}$ -HSQC overlay of WT and F171G showing significant and broadly dispersed CSDs. In both overlays, site of mutation is shown as red star and residues

located in different regions of the contact network are labelled with their assignments referring to the WT spectra. Spectra were recorded for 50  $\mu$ M (W108G) and 750  $\mu$ M (F171G) protein at 298 K at a 600 MHz spectrometer. **c)** Effect of nat\_ and des\_ mutations on the  $^1\text{H}/^{15}\text{N}$  CSD of the tryptophan 108 sidechain compared to WT. Asterisk denotes W108 sidechain assignment in F171G that was transferred from WT based on  $^1\text{H},^{15}\text{N}$  chemical shift similarity.

**Supplementary Fig. 10**

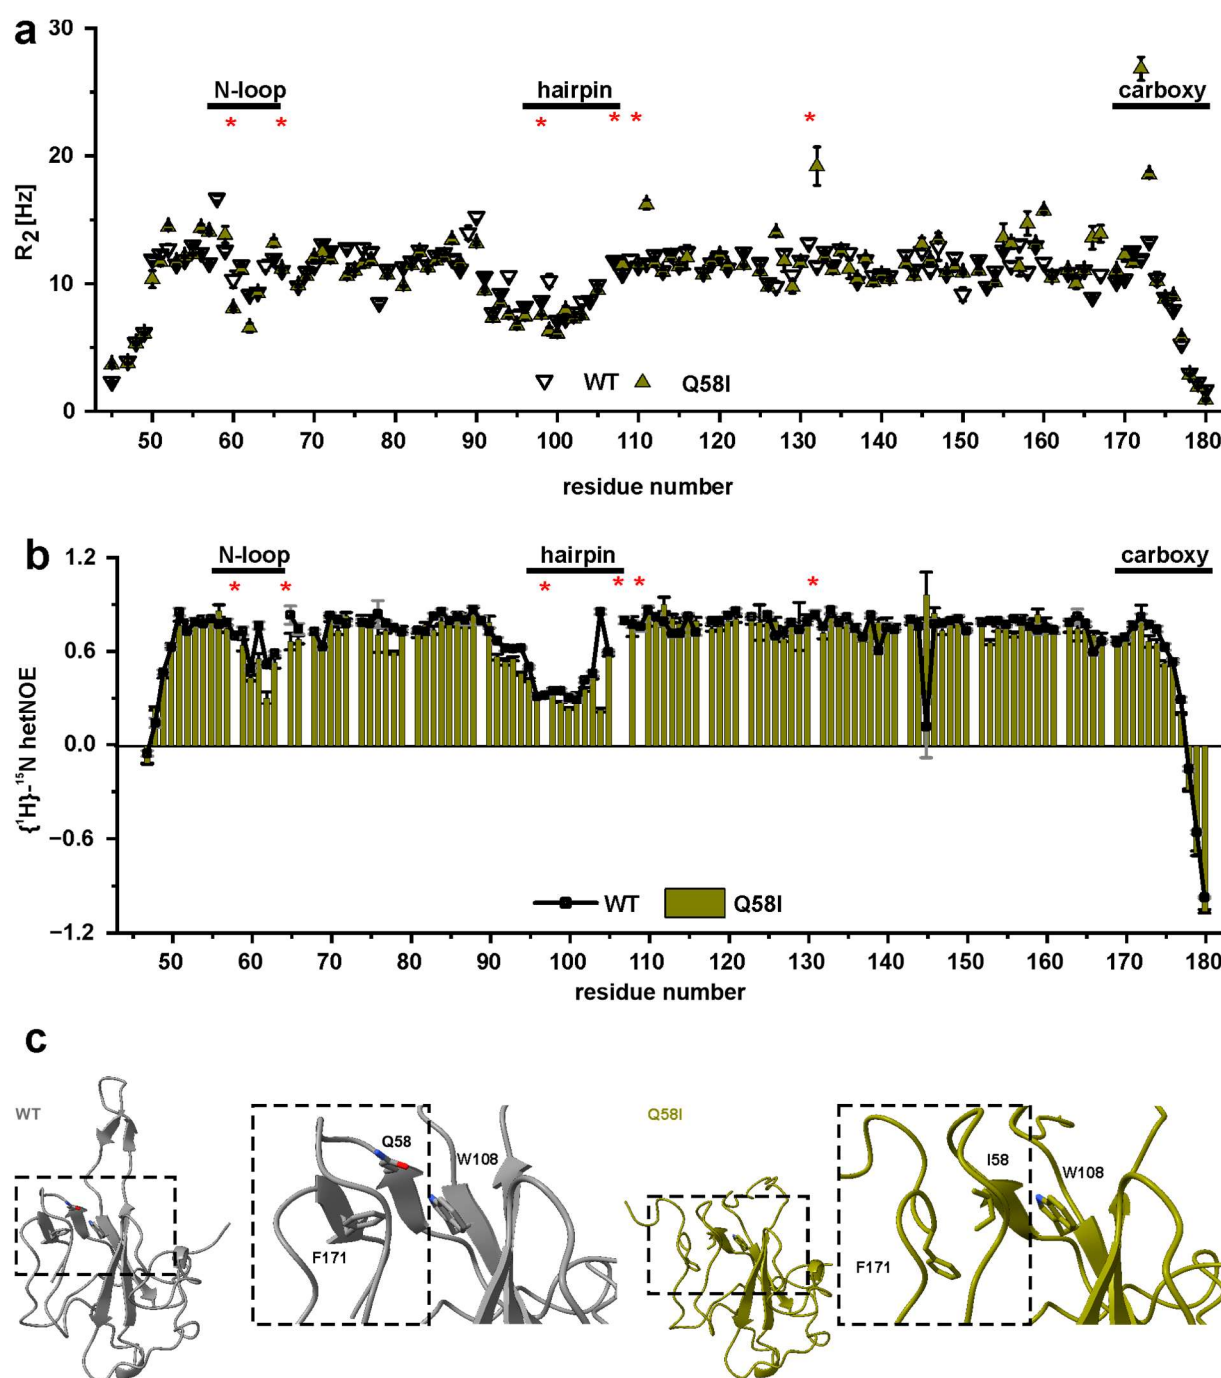

**Supplementary Fig. 10:** **a**) Residue-specific  $R_2$  relaxation rates for Q58I (upward facing triangles in color) vs WT (downward facing triangles). Error bars are shown in gray. The Levenberg-Marquardt model was used to fit the relaxation rates. Error bars represent standard errors from the covariance matrix automatically calculated by the program CCPNMR Analysis. Red asterisks denote residues with invisible backbone NH resonances due to line broadening in Q58I. Spectra were acquired from 750  $\mu\text{M}$  protein at 298 K. **b**)  $\{^1\text{H}\}-^{15}\text{N}$  hetNOE values for Q58I (as bars in color with error bars in black) and WT (as squares with error bars in black). Error bars represent the intensity ratio of saturated over unsaturated peaks, respectively, considering the local noise of each peak according to equation 4 in the Methods section. Red asterisks denote residues with invisible backbone NH resonances due to line broadening in Q58I. Spectra were acquired at 298 K. **c**) Crystal structures of WT (left) and des\_mutant Q58I (right). Zoom-ins show the destabilized carboxy finger in the mutant compared to WT. Core network residues are labelled and represented as sticks.

**Supplementary Fig. 11**

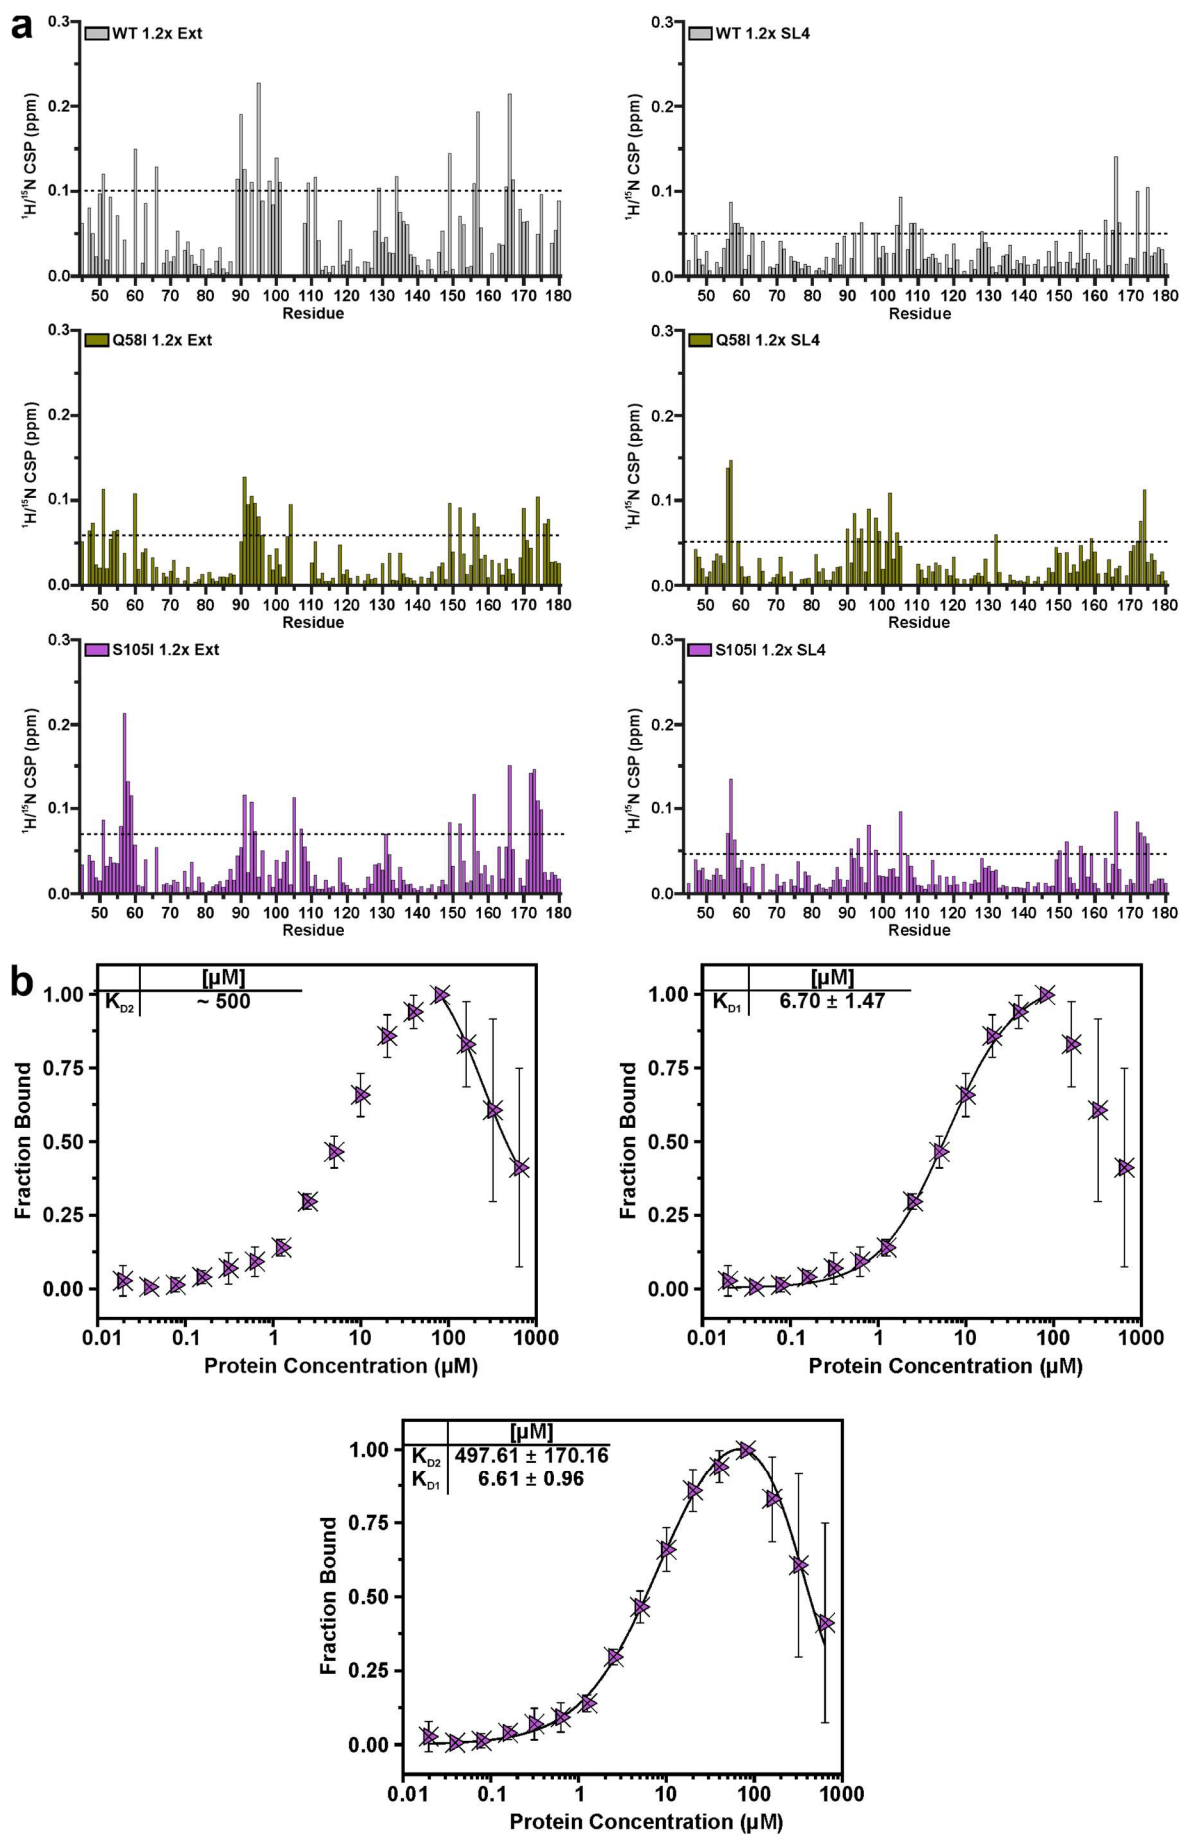



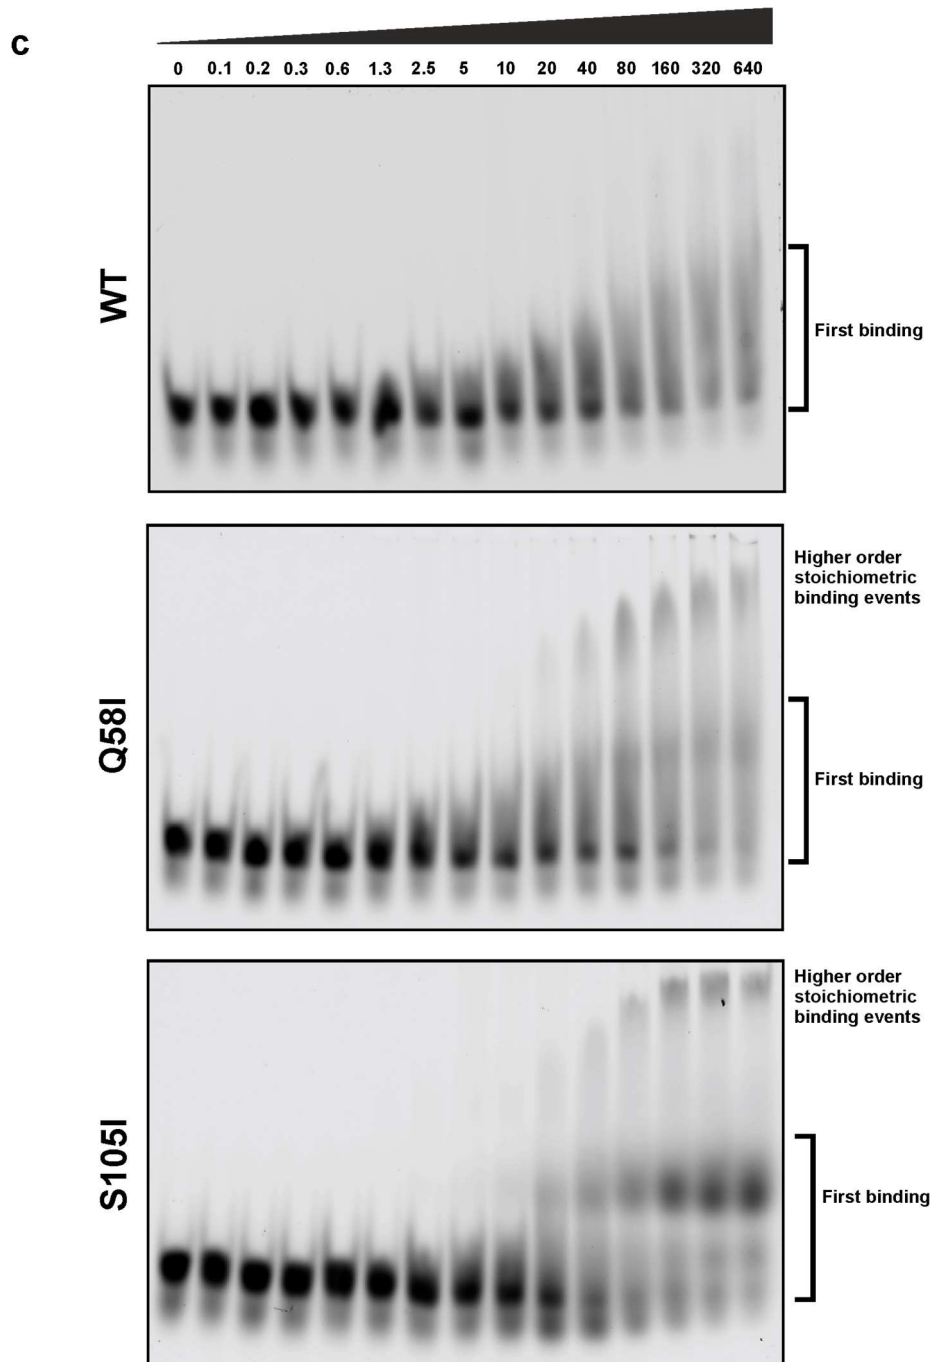

**Supplementary Fig. 11: a)**  $^1\text{H}/^{15}\text{N}$  CSP plots for WT, Q58I and S105I comparing apo proteins to complexes with 1.2 equivalents of either Ext (left) or SL4 (right). Underlying spectra were recorded in NTD buffer for 70  $\mu\text{M}$  protein (apo) and 70  $\mu\text{M}$  protein with 84  $\mu\text{M}$  RNA at a 600 MHz spectrometer at 298 K. Prolines and peaks that were line-broadened beyond detection appear as gaps in the plot. The threshold for significance of CSPs (average + 1 SD) is indicated by a dotted line. **b)** MST-derived  $K_D$  values of viral SL4 RNA when titrated with des\_mutant S105I. Data are presented as mean values  $\pm$  SD from three biological replicates ( $N=3$ ), each measured in duplicate. Error bars represent SD from replicates. The binding curve implies a binding stoichiometry above 1:1 indicated by the last three titration points with non-monotonic behavior. Individual single fits (Hill model) to the first and second binding events are shown. Note that quantification of the second binding event can only be estimated by the software and appears at high, non-physiological concentrations of protein. For comparison, a biphasic fit including both binding events (BiHill model) is shown below and reveals the independence of binding sites from the fit procedure and from each other. This suggests the later binding event is non-specific and subordinate. Errors derive from three biological replicates. **c)** Fluorescent EMSAs of 3'-Cy5 labelled non-target RNA SL4 when titrated with NTD WT and des\_mutants. Protein concentrations are given above. The occurrence of higher order stoichiometric binding events for mutant S105I (as well as the related mutant Q58I) are suggested to reflect the second binding event observed in MST (panel b).

**Supplementary Table 1:** Triple resonance experiment details used for assignments.

| Mutant | BMRB ID | % NH assigned | Residues with unassigned NHs              | Sample concentration (μM) | Experiment type       | Spectrometer type ( <sup>1</sup> H Larmor frequency) | Acquisition details |           |           |       |
|--------|---------|---------------|-------------------------------------------|---------------------------|-----------------------|------------------------------------------------------|---------------------|-----------|-----------|-------|
|        |         |               |                                           |                           |                       |                                                      | F3 points           | F2 points | F1 points | Scans |
| D63G   | 52471   | 98.5          | G43, G44                                  | 750                       | HSQC                  | 600 MHz                                              |                     | 2048      | 128       | 40    |
|        |         |               |                                           | 750                       | HNCACB                | 600 MHz                                              | 2048                | 72        | 122       | 16    |
|        |         |               |                                           | 750                       | HN(CA)CO              | 600 MHz                                              | 1536                | 64        | 48        | 16    |
|        |         |               |                                           | 750                       | HNCO                  | 600 MHz                                              | 2048                | 48        | 48        | 16    |
| P67S   | 52472   | 98.5          | G43, G44                                  | 750                       | HSQC                  | 600 MHz                                              |                     | 2048      | 128       | 40    |
|        |         |               |                                           | 750                       | HNCACB                | 600 MHz                                              | 2048                | 72        | 122       | 16    |
|        |         |               |                                           | 750                       | HNCO                  | 600 MHz                                              | 2048                | 32        | 48        | 16    |
|        |         |               |                                           | 750                       | HSQC                  | 600 MHz                                              |                     | 2048      | 128       | 40    |
| P80R   | 52473   | 98.5          | G43, G44                                  | 750                       | HNCACB                | 600 MHz                                              | 2048                | 72        | 122       | 16    |
|        |         |               |                                           | 750                       | HNCO                  | 600 MHz                                              | 2048                | 32        | 48        | 16    |
|        |         |               |                                           | 750                       | HSQC                  | 600 MHz                                              |                     | 2048      | 128       | 40    |
| S105I  | 52474   | 98.5          | G43, G44                                  | 750                       | HSQC                  | 700 MHz                                              |                     | 2048      | 128       | 40    |
|        |         |               |                                           | 610                       | HNCACB                | 700 MHz                                              | 1536                | 112       | 140       | 16    |
|        |         |               |                                           | 750                       | HNCO                  | 600 MHz                                              | 2048                | 32        | 48        | 16    |
| Y109A  | 52470   | 97.8          | G43, G44, G97                             | 750                       | HSQC                  | 600 MHz                                              |                     | 2048      | 128       | 40    |
|        |         |               |                                           | 750                       | HNCACB                | 600 MHz                                              | 2048                | 72        | 122       | 16    |
|        |         |               |                                           | 750                       | HN(CA)CO              | 600 MHz                                              | 1536                | 64        | 56        | 16    |
| Q58I   | 52469   | 94.2          | G43, G44, I58, L64, G97, R107, Y109, I131 | 750                       | HSQC                  | 600 MHz                                              |                     | 2048      | 128       | 40    |
|        |         |               |                                           | 750                       | HNCACB                | 600 MHz                                              | 2048                | 72        | 122       | 16    |
|        |         |               |                                           | 750                       | HNCA                  | 600 MHz                                              | 2048                | 72        | 64        | 28    |
|        |         |               |                                           | 1500                      | HN(CA)CO              | 600 MHz                                              | 1536                | 64        | 52        | 16    |
|        |         |               |                                           | 1500                      | HNCO                  | 600 MHz                                              | 2048                | 32        | 48        | 16    |
|        |         |               |                                           | 750                       | CBCA(CO)NH            | 600 MHz                                              | 2048                | 48        | 72        | 60    |
|        |         |               |                                           | 750                       | <sup>15</sup> N-NOESY | 1.2 GHz                                              | 2048                | 80        | 96        | 16    |

\*<sup>1</sup>Hε-<sup>15</sup>Nε (glutamine residues), <sup>1</sup>Hδ-<sup>15</sup>Nδ (asparagine residues) and <sup>1</sup>Hε-<sup>15</sup>Nε (tryptophan residues)

**Supplementary Table 2:** Protein crystallization conditions.

|                            | <b>NTD_WT</b>                                             | <b>NTD_D63G</b>                                                          | <b>NTD_P67S</b>                                    | <b>NTD_P80R</b>                                   | <b>NTD_A119S</b>                                                           |
|----------------------------|-----------------------------------------------------------|--------------------------------------------------------------------------|----------------------------------------------------|---------------------------------------------------|----------------------------------------------------------------------------|
| Concentration (mg/mL)      | 15                                                        | 15                                                                       | 15                                                 | 12                                                | 15                                                                         |
| Temperature (K)            | 293                                                       | 293                                                                      | 293                                                | 285                                               | 293                                                                        |
| Protein buffer             | 20 mM Tris-HCl<br>50 mM NaCl<br>1 mM DTT<br>pH 8.0        | 20 mM Tris-HCl<br>50 mM NaCl<br>1 mM DTT<br>pH 8.0                       | 20 mM Tris-HCl<br>50 mM NaCl<br>1 mM DTT<br>pH 8.0 | 20mM Tris-HCl<br>25mM Na2SO4<br>1mM DTT<br>pH 9.0 | 20 mM Tris-HCl<br>50 mM NaCl<br>1 mM DTT<br>pH 8.0                         |
| Crystallization conditions | 100 mM MES pH 6.0<br>20 % PEG 6000<br>10 mM Zinc Chloride | 50mM HEPES pH 6.8<br>150mM Sodium Chloride<br>24% PEG 3350<br>2% PEG 400 | 150mM Sodium chloride<br>28% PEG Smear Medium      | 22 % PEG 3350<br>200 mM Zinc Acetate dihydrate    | 100 mM Tris-HCl pH 8.5<br>200 mM Sodium acetate trihydrate<br>30% PEG 4000 |
| Crystallization technique  | Sitting drop vapor diffusion                              | Sitting drop vapor diffusion                                             | Sitting drop vapor diffusion                       | Hanging drop vapor diffusion                      | Sitting drop vapor diffusion                                               |
| Crystal shape              | Single Rods                                               | Single Rods                                                              | Single Rods                                        | Hexagonal prisms                                  | Single Rods                                                                |
| Days to grow crystals      | 3                                                         | 3                                                                        | 3                                                  | 2                                                 | 3                                                                          |

  

|                            | <b>NTD_E136D</b>                                   | <b>NTD_P151S</b>                                   | <b>NTD_Q58I</b>                                                                                                          | <b>NTD_S105I</b>                                   | <b>NTD_Y109A</b>                                   |
|----------------------------|----------------------------------------------------|----------------------------------------------------|--------------------------------------------------------------------------------------------------------------------------|----------------------------------------------------|----------------------------------------------------|
| Concentration (mg/mL)      | 15                                                 | 15                                                 | 12                                                                                                                       | 12                                                 | 9                                                  |
| Temperature (K)            | 293                                                | 293                                                | 277                                                                                                                      | 293                                                | 277                                                |
| Protein buffer             | 20 mM Tris-HCl<br>50 mM NaCl<br>1 mM DTT<br>pH 8.0 | 20 mM Tris-HCl<br>50 mM NaCl<br>1 mM DTT<br>pH 8.0 | 20 mM Tris-HCl<br>50 mM NaCl<br>1 mM DTT<br>pH 8.0                                                                       | 20 mM Tris-HCl<br>50 mM NaCl<br>1 mM DTT<br>pH 8.0 | 20 mM Tris-HCl<br>50 mM NaCl<br>1 mM DTT<br>pH 8.0 |
| Crystallization conditions | 100 mM BICINE pH 9.3<br>20 % PEG 3350              | 100mM Sodium HEPES pH 7.5<br>4.3M Sodium chloride  | 100mM HEPES pH 7.5<br>200mM Ammonium sulfate<br>10mM Cadmium chloride<br>25% PEG Smear Medium<br>30mM Manganese chloride | 22% PEG 3350<br>200mM Zinc Acetate dihydrate       | 30% PEG 5000                                       |
| Crystallization technique  | Sitting drop vapor diffusion                       | Sitting drop vapor diffusion                       | Hanging drop vapor diffusion                                                                                             | Hanging drop vapor diffusion                       | Sitting drop vapor diffusion                       |
| Crystal shape              | Single Rods                                        | Single Rods                                        | Plates                                                                                                                   | Tetragonal bipyramids                              | Rod cluster                                        |
| Days to grow crystals      | 3                                                  | 7                                                  | 3                                                                                                                        | 4                                                  | 1                                                  |

**Supplementary Table 3:** Crystal data collection and refinement statistics.

| <b>Data Collection</b>                |                               |                               |                               |                             |                               |
|---------------------------------------|-------------------------------|-------------------------------|-------------------------------|-----------------------------|-------------------------------|
|                                       | <b>NTD_WT</b>                 | <b>NTD_D63G</b>               | <b>NTD_P67S</b>               | <b>NTD_P80R</b>             | <b>NTD_A119S</b>              |
| PDB                                   | 9EXB                          | 9F83                          | 9EZB                          | 9F7A                        | 9F5L                          |
| Resolution range (Å)                  | 67.14 – 2.30<br>(2.38 – 2.30) | 50.43 – 1.70<br>(1.73 – 1.70) | 66.73 – 1.60<br>(1.63 – 1.60) | 57.81 – 1.9<br>(1.94 – 1.9) | 67.52 – 2.36<br>(2.49 – 2.36) |
| Space group                           | P 21 21 21                    | P 1 21 1                      | P 21 21 21                    | P 65 2 2                    | P 21 21 21                    |
| Cell dimensions                       |                               |                               |                               |                             |                               |
| a, b, c (Å)                           | 58.92, 93.07,<br>96.94        | 59.01, 55.66,<br>84.89        | 58.79, 92.47,<br>96.39        | 66.75, 66.75,<br>121.21     | 58.87, 92.20,<br>99.17        |
| α, β, γ (°)                           | 90.00, 90.00,<br>90.00        | 90.00, 95.15,<br>90.00        | 90.00, 90.00,<br>90.00        | 90.00, 90.00,<br>120.00     | 90.00, 90.00,<br>90.00        |
| I/σI                                  | 11.8 (0.9)                    | 12.1 (1.80)                   | 11.2 (2.20)                   | 20.2 (1.25)                 | 6.1 (1.20)                    |
| R <sub>meas</sub>                     | 0.21 (4.26)                   | 0.09 (1.30)                   | 0.11 (1.02)                   | 0.09 (13.04)                | 0.29 (1.82)                   |
| R <sub>pim</sub>                      | 0.05 (0.88)                   | 0.04 (0.49)                   | 0.04 (0.32)                   | 0.02 (2.64)                 | 0.11 (0.70)                   |
| CC <sub>1/2</sub>                     | 1.00 (0.60)                   | 1.00 (0.74)                   | 1.00 (0.84)                   | 1.00 (0.31)                 | 0.96 (0.41)                   |
| Multiplicity                          | 21.0 (22)                     | 6.6 (6.8)                     | 10.3 (9.7)                    | 36.4 (23.9)                 | 6.8 (6.4)                     |
| Completeness (%)                      | 99.7 (100.0)                  | 98.0 (99.0)                   | 99.6 (97.1)                   | 99.9 (99.9)                 | 96.3 (94.6)                   |
| <b>Refinement</b>                     |                               |                               |                               |                             |                               |
| R <sub>work</sub> / R <sub>free</sub> | 0.253 / 0.295                 | 0.239 / 0.284                 | 0.212 / 0.234                 | 0.276 / 0.348               | 0.299 / 0.314                 |
| No.atoms                              |                               |                               |                               |                             |                               |
| Protein                               | 3913                          | 3791                          | 3931                          | 921                         | 3848                          |
| Water                                 | 221                           | 502                           | 436                           | 50                          | 150                           |
| Ligand                                | 0                             | 0                             | 50                            | 1                           | 0                             |
| B-factors                             |                               |                               |                               |                             |                               |
| Protein                               | 63.82                         | 21.6                          | 45.4                          | 78.1                        | 41.0                          |
| Water                                 | 59.00                         | 49.9                          | 46.6                          | 71.5                        | 26.6                          |
| Ligand                                | 0                             | 0                             | 45.9                          | 65.6                        | 0                             |
| R.m.s. deviations                     |                               |                               |                               |                             |                               |
| Bond lengths (Å)                      | 0.011                         | 0.0139                        | 0.012                         | 0.0100                      | 0.0087                        |
| Bond angles (°)                       | 1.544                         | 2.0830                        | 1.602                         | 1.7820                      | 1.36                          |
| Ramachandran favoured (%)             | 96.5                          | 97.1                          | 99.0                          | 97.3                        | 98.0                          |
| Ramachandran allowed (%)              | 3.3                           | 2.9                           | 1.0                           | 2.7                         | 2.0                           |
| Ramachandran outliers (%)             | 0.2                           | 0.0                           | 0.0                           | 0.0                         | 0.0                           |
| Rotamer outliers (%)                  | 0.5                           | 1.3                           | 0.8                           | 0.0                         | 1.0                           |
| Clash score                           | 0.5                           | 1.9                           | 1.3                           | 0.6                         | 2.8                           |
| MolProbity score                      | 0.9                           | 1.2                           | 0.85                          | 0.81                        | 1.08                          |

Values in parentheses are for highest resolution shell.

| <b>Data Collection</b>                |                               |                               |                               |                               |                               |
|---------------------------------------|-------------------------------|-------------------------------|-------------------------------|-------------------------------|-------------------------------|
| PDB                                   | <b>NTD_E136D</b><br>9EVY      | <b>NTD_P151S</b><br>9FBG      | <b>NTD_Q58I</b><br>9F5J       | <b>NTD_S105I</b><br>9F7C      | <b>NTD_Y109A</b><br>9EWH      |
| Resolution range (Å)                  | 84.29 – 1.55<br>(1.58 – 1.55) | 47.75 – 2.54<br>(2.58 – 2.54) | 57.12 – 2.20<br>(2.27 – 2.20) | 41.45 – 2.00<br>(2.05 – 2.00) | 83.74 – 1.93<br>(1.98 – 1.93) |
| Space group                           | P 1 2 1 1                     | C 1 2 1                       | P 2 1 2 1 2 1                 | P 4 1 2 1 2                   | P 1 2 1 1                     |
| Cell dimensions                       |                               |                               |                               |                               |                               |
| a, b, c (Å)                           | 58.87, 55.10,<br>84.59        | 188.11, 108.88,<br>146.27     | 47.78, 49.72,<br>114.25       | 58.62, 58.62,<br>111.59       | 58.84, 55.14,<br>84.09        |
| α, β, γ (°)                           | 90.00, 94.82,<br>90.00        | 90.00, 100.79,<br>90.00       | 90.00, 90.00,<br>90.00        | 90.00, 90.00,<br>90.00        | 90.00, 95.24,<br>90.00        |
| I/σI                                  | 16.0 (3.90)                   | 11.7 (1.60)                   | 25.0 (6.40)                   | 15.8 (1.20)                   | 12.5 (2.98)                   |
| R <sub>meas</sub>                     | 0.06 (0.47)                   | 0.09 (0.95)                   | 0.11 (0.63)                   | 0.07 (1.86)                   | 0.11 (0.67)                   |
| R <sub>pim</sub>                      | 0.03 (0.19)                   | 0.05 (0.52)                   | 0.02 (0.11)                   | 0.02 (0.55)                   | 0.04 (0.23)                   |
| CC1/2                                 | 1.00 (0.92)                   | 1.00 (0.66)                   | 1.00 (0.99)                   | 1.00 (0.94)                   | 1.00 (0.90)                   |
| Multiplicity                          | 5.9 (5.9)                     | 3.5 (3.3)                     | 43.2 (33.7)                   | 12.4 (11.2)                   | 8.2 (8.4)                     |
| Completeness (%)                      | 97.6 (97.5)                   | 99.8 (96.4)                   | 99.9 (100)                    | 99.8 (92.0)                   | 98.9 (99.2)                   |
| <b>Refinement</b>                     |                               |                               |                               |                               |                               |
| R <sub>work</sub> / R <sub>free</sub> | 0.223 / 0.230                 | 0.209 / 0.251                 | 0.206 / 0.245                 | 0.241 / 0.275                 | 0.209 / 0.252                 |
| No.atoms                              |                               |                               |                               |                               |                               |
| Protein                               | 3936                          | 18516                         | 1894                          | 1046                          | 3932                          |
| Water                                 | 517                           | 1116                          | 138                           | 52                            | 731                           |
| Ligand                                | 0                             | 0                             | 4                             | 2                             | 0                             |
| B-factors                             |                               |                               |                               |                               |                               |
| Protein                               | 30.1                          | 50.7                          | 49.5                          | 81.6                          | 29.5                          |
| Water                                 | 32.5                          | 45.4                          | 49.8                          | 70.5                          | 38.5                          |
| Ligand                                | 0                             | 0                             | 98.4                          | 60.7                          | 0                             |
| R.m.s. deviations                     |                               |                               |                               |                               |                               |
| Bond lengths (Å)                      | 0.012                         | 0.010                         | 0.0135                        | 0.0107                        | 0.011                         |
| Bond angles (°)                       | 1.996                         | 1.396                         | 1.909                         | 2.5610                        | 1.581                         |
| Ramachandran favoured (%)             | 97.8                          | 96.7                          | 97.5                          | 92.4                          | 98.8                          |
| Ramachandran allowed (%)              | 2.2                           | 3.0                           | 2.5                           | 6.8                           | 1.2                           |
| Ramachandran outliers (%)             | 0.0                           | 0.3                           | 0.0                           | 0.8                           | 0.0                           |
| Rotamer outliers (%)                  | 0.5                           | 2.1                           | 1.6                           | 1.9                           | 0.2                           |
| Clash score                           | 2.5                           | 1.9                           | 2.4                           | 1.4                           | 0.5                           |
| MolProbity score                      | 1.08                          | 1.4                           | 1.28                          | 1.56                          | 0.68                          |

Values in parentheses are for highest resolution shell.

**Supplementary Table 4:** Comparison of  $\{^1\text{H}\}$ - $^{15}\text{N}$  hetNOE values for finger regions of WT, S105I and Q58I. Given are average hetNOE values for the indicated region. The given errors represent the average error for the respective region, calculated according to equation (4) in the methods section.

| average hetNOE comparison     | WT                                             | S105I                      | Q58I                       |
|-------------------------------|------------------------------------------------|----------------------------|----------------------------|
| N-loop finger (aa 58 – 63)    | $0.64 \pm 0.02$                                | $0.65 \pm 0.08$            | $0.50 \pm 0.03^{\text{a}}$ |
| hairpin finger (aa 90 – 107)  | $0.53 \pm 0.02$ ( $0.52 \pm 0.01^{\text{b}}$ ) | $0.45 \pm 0.04^{\text{b}}$ | $0.44 \pm 0.01^{\text{b}}$ |
| carboxy finger (aa 170 – 180) | $0.33 \pm 0.02$                                | $0.31 \pm 0.05$            | $0.26 \pm 0.02$            |

<sup>a</sup> without residue 58; <sup>b</sup> without residues G97, R107.



## Supplementary References

1. Gangavarapu, K. *et al.* Outbreak.info genomic reports: scalable and dynamic surveillance of SARS-CoV-2 variants and mutations. *Nat Methods* **20**, 512–522 (2023).
2. Korn, S. M., Dhamotharan, K., Jeffries, C. M. & Schlundt, A. The preference signature of the SARS-CoV-2 Nucleocapsid NTD for its 5'-genomic RNA elements. *Nat Commun* **14**, 3331 (2023).
3. Vögele, J. *et al.* High-resolution structure of stem-loop 4 from the 5'-UTR of SARS-CoV-2 solved by solution state NMR. *Nucleic Acids Research* **51**, 11318–11331 (2023).
4. Zok, T. *et al.* RNApdbee 2.0: multifunctional tool for RNA structure annotation. *Nucleic Acids Research* **46**, W30–W35 (2018).
5. Jurrus, E. *et al.* Improvements to the APBS biomolecular solvation software suite. *Protein Sci* **27**, 112–128 (2018).
6. Wang, J. *et al.* iCn3D, a web-based 3D viewer for sharing 1D/2D/3D representations of biomolecular structures. *Bioinformatics* **36**, 131–135 (2020).
7. Szelazek, B. *et al.* Structural Characterization of Human Coronavirus NL63 N Protein. *Journal of Virology* **91**, 10.1128/jvi.02503-16 (2017).
8. Fan, H. *et al.* The Nucleocapsid Protein of Coronavirus Infectious Bronchitis Virus: Crystal Structure of Its N-Terminal Domain and Multimerization Properties. *Structure* **13**, 1859–1868 (2005).
